# Supplementary material
Source: publisher figshare collection journal article supplement (https://sage.figshare.com/ndownloader/files/20467665)
Supplement: Supplementary file 1 [file 20467665]

# Appendix A: SAGAT Studies – Sensitivity Analysis

| **Paper** | **Domain** | **Environment** | **Subjects** | **Number** | **Measure** | **Scoring** | **Sensitivity** | **Correct method** | **Findings** |
| --- | --- | --- | --- | --- | --- | --- | --- | --- | --- |
| **(Alexander & Wickens, 2005)** | Aviation | Simulation | Experienced | 24 | SAGAT | By Query | 0 | 0 | Not sensitive to display conditions |
| **(Barnes, McDermott, Hutchins, & Rothrock, 2011)** | Military | Microworld | Students | 48 | SAGAT | Combined | 1 | 0 | Sensitive to display conditions |
| **(Blömacher, Nöcker, & Huff, 2018)** | Driving | Video | Experienced | 120 | SAGAT | By Level | 1 | 1 | Sensitive to automation descriptions and experience with system |
| **(Bogossian et al., 2014)** | Medical | Live Exercises | Novice | 97 | End of trial queries | Combined | 1 | 0 | Sensitive to training location |
| **(Bolstad & Endsley, 2003)** | Military | Simulation | Experienced | 25 | SAGAT | By Query | 1 | 1 | Sensitive to team differences |
| **(Bolstad, Cuevas, Gonzalez, & Schneider, 2005)** | Military | Live Exercises | Novice | 17 | SAGAT | Combined | 1 | 0 | Sensitive to training conditions |
| **(Bolstad, Endsley, Costello, & Howell, 2010)** | Aviation | Simulation | Experienced & Novice | 48 | SAGAT | By Query | 1 | 1 | Sensitive to training conditions |
| **(Bowden & Rusnock, 2015)** | Process control | Simulation | General | 24 | SAGAT | By Level | 1 | 1 | Level 3 SA sensitive to display conditions |
| **(Buchler et al., 2016)** | Military | Simulation | Experienced | 213 | SAGAT | Combined | 1 | 0 | Sensitive to information sharing frequency and patterns |
| **(Burns et al., 2008)** | Process control | Simulation | Experienced | 6 | SAGAT | By Level | 1 | 1 | Level 1 SA sensitive to interface type, scenarios and phase |
| **(Carmody & Gluckman, 1993)** | Process control | Microworld | General | 32 | SAGAT | By Level | 1 | 1 | Sensitive to automation differences |
| **(Catherwood, Edgar, Sallis, Medley, & Brookes, 2012)** | Other | Microworld | Experienced | 50 | QUASA | QUASA | 0 | 0 | Not sensitive to decision differences |
| **(Catherwood, et al., 2012)** | Other | Live Exercises | Experienced | 16 | QUASA | QUASA | 0 | 0 | Not sensitive to decision differences |
| **(Chancey & Bliss, 2012)** | Military | Microworld | Students | 36 | SAGAT | By Level | 0 | 1 | Not sensitive to information reliability descriptions |
| **(Chandrasekaran, 2019)** | Driving | Simulation | Novice & Experienced | 80 | SAGAT | By Level | 1 | 1 | Sensitive to passenger experience level and conversation modulation |
| **(Chang, Scott, & Hancock, 2014)** | Medical | Microworld | Experienced | 36 | SAGAT | Combined | 1 | 0 | Sensitive to control placement and display conditions |
| **(Chang et al., 2015)** | Medical | Live Exercises | Novice | 10 | SAGAT | By Level | 0.5 | 1 | Marginally sensitive to training condition |
| **(Clark, McLaughlin, & Feng, 2017)** | Driving | Video | Experienced | 50 | SAGAT | Combined | 1 | 0 | Sensitive to automation takeover performance |
| **(Clark, et al., 2017)** | Driving | Video | General | 32 | SAGAT | Combined | 1 | 0 | Sensitive of automation take-over performance |
| **(Cooper et al., 2010)** | Medical | Live Exercises | Novice | 51 | SAGAT | Combined | 0 | 0 | Not sensitive to scenario differences |
| **(Cooper et al., 2012)** | Medical | Live Exercises | Novice | 35 | End of trial queries | Combined | 1 | 0 | Sensitive to scenario differences |
| **(Crooks, Hu, & Mahan, 2001)** | Military | Microworld | Students | 165 | SAGAT | By Query | 1 | 1 | Sensitive to cue type differences |
| **(Crundall, 2016)** | Driving | Video | Novice & Experienced | 30 | SAGAT | By Query | 1 | 0 | Sensitive to experience levels and video clip length |
| **(Crundall, 2016)** | Driving | Video | Novice & Experienced | 42 | SAGAT | By Query | 1 | 0 | Sensitive to experience levels and video clip endpoint |
| **(Crundall, 2016)** | Driving | Video | Novice & Experienced | 30 | SAGAT | By Query | 1 | 0 | Sensitive to experience levels and event type |
| **(Crundall, 2018)** | Driving | Video | Novice & Experienced | 84 | SAGAT | By Query | 1 | 0 | Sensitive to experience levels |
| **(Cummings & Guerlain, 2007)** | Military | Simulation | Experienced | 42 | End of trial queries | ? | 0 | 0 | Not sensitive |
| **(D’Aniello, Gaeta, Gaeta, & Tomasiello, 2018)** | Other | Simulation | Students | 10 | SAGAT | By Query | 1 | 1 | Sensitive to display conditions |
| **(Endsley, 1988)** | Aviation | Simulation | Experienced | 10 | SAGAT | By Query | 1 | 1 | Sensitive to differences in avionics hardware |
| **(Endsley, 1995)** | Aviation | Simulation | Experienced | 6 | SAGAT | By Query | 1 | 1 | Sensitive to display differences |
| **(Endsley & Bolstad, 1994)** | Aviation | Simulation | Experienced | 21 | SAGAT | By Query | 1 | 1 | Sensitive to individual differences |
| **(Endsley & Kaber, 1999)** | Experi-mental | Microworld | Students | 30 | SAGAT | By Level | 1 | 1 | Sensitive to automation differences |
| **(Endsley & Kiris, 1995)** | Driving | Microworld | Experienced | 80 | SAGAT | By Query | 1 | 1 | Sensitive to automation conditions |
| **(Endsley & Rodgers, 1998)** | ATC | Video | Experienced | 40 | SAGAT | By Query | 1 | 1 | Sensitive to task load |
| **(Endsley & Selcon, 1997) also (Endsley, Selcon, Hardiman, & Croft, 1998)** | Aviation | Simulation | Experienced | 12 | SAGAT | By Query | 0.5 | 1 | Moderately sensitive to display conditions |
| **(Endsley, Mogford, & Stein, 1997)** | ATC | Simulation | Experienced | 10 | SAGAT | By Query | 1 | 1 | Sensitive to free flight conditions |
| **(Endsley, Sollenberger, & Stein, 1999) also (Jones & Endsley, 2004)** | ATC | Simulation | Experienced | 10 | SAGAT | By Query | 1 | 1 | Sensitive to display differences |
| **(Falkland & Wiggins, 2019)** | ATC | Microworld | Students | 68 | SAGAT | By Level | 1 | 1 | Sensitive to individual differences in cue utilization |
| **(Franz et al., 2015)** | Driving | Simulation | Experienced | 45 | SAGAT | By Query | 1 | 1 | Sensitive to automation conditions |
| **(Giacobe, 2013)** | Other | Microworld | Novice | 28 | SAGAT | Combined | 0 | 0 | Not sensitive to display conditions |
| **(Golightly, Balfe, Sharples, & Lowe, 2009)** | Other | Simulation | Experienced | 6 | End of trial queries | Combined | 0 | 0 | Not sensitive to automation conditions |
| **(Gombolay, Bair, Huang, & Shah, 2017)** | Robotics | Simulation | Students | 20 | End of trial queries | By Query | 1 | 0 | Sensitive to automation conditions |
| **(González-Giraldo et al., 2018)** | Experimental | Experimental | Students | 230 | SAGAT | By Level | 1 | 1 | Sensitive to genetic difference in subjects |
| **(Gronlund, Ohrt, Dougherty, Perry, & Manning, 1998)** | ATC | Simulation | Experienced | 11 | SAGAT | By Query | 1 | 1 | Sensitive to aircraft importance |
| **(Guarino, Harper, Roth, Liu, & Vincenzi, 2009)** | Aviation | Simulation | Novice | 36 | End of trial queries | Combined | 0 | 0 | Not sensitive to display condition |
| **(Gugerty, 1998)** | Driving | Simulation | Experienced | 26 | SAGAT | By Query | 1 | 1 | Sensitive to vehicle locations |
| **(Hallbert, 1997)** | Process control | Simulation | Experienced | 8 | SACRI | SACRI | 1 | 0 | Sensitive to scenario differences and timeline |
| **(Hänsel et al., 2012)** | Medical | Simulation | Novice | 59 | SAGAT | Combined | 1 | 0 | Sensitive to training differences |
| **(Hauss & Eyferth, 2003)** | ATC | Simulation | Experienced | 11 | SALSA | SALSA | 1 | 0 | Sensitive to planning concept |
| **(Heenan, Herdman, Brown, & Robert, 2014)** | Driving | Simulation | Experienced | 28 | End of trial queries | By Query | 1 | 0 | Sensitive to vehicle position and conversation condition |
| **(Hoang, Jung, Holbrook, & Malik, 2011)** | ATC | Simulation | Experienced | 2 | SAGAT | Combined | 1 | 0 | Sensitive to advisories at high workload but not low workload |
| **(Hogan, Pace, Hapgood, & Boone, 2006)** | Medical | Simulation | Novice & Experienced | 16 | SAGAT | Combined | 1 | 0 | SAGAT correlated with expertise and performance scores |
| **(Hogg, Torralba, & Volden, 1993)** | Process control | Simulation | Experienced | 11 | SACRI | SACRI | 1 | 0 | Sensitive to expertise differences, interface differences, and process disturbances |
| **(Hogg, Folles⊘, Strand-Volden, & Torralba, 1995)** | Process control | Simulation | Novice & Experienced | 8 | SACRI | SACRI | 1 | 0 | Sensitive to scenario and subject differences |
| **(Hong, Andrew, & Kenny, 2015)** | Other | Simulation | General | 12 | SAGAT | Combined | 1 | 0 | Sensitive to augmented reality conditions |
| **(Hou, Kobierski, & Brown, 2007)** | Robotics | Simulation | Experienced | 24 | SAGAT | Combined | 1 | 0 | Sensitive to adaptive interface conditions |
| **(Hudson, Taylor, Kozachik, Shaefer, & Wilson, 2015)** | Medical | Simulation | Experienced | 12 | SAGAT | Combined | 1 | 1 | Sensitive to individual differences |
| **(Ikuma, Harvey, Taylor, & Handal, 2014)** | Process control | Simulation | Students | 10 | SAGAT | By Level | 1 | 1 | Sensitive to display and workload interactions |
| **(Jang, 2013)** | Process control | Simulation | Experienced | 8 | SACRI | SACRI | 0 | 0 | Not sensitive to display condition |
| **(Jannat, 2018)** | Driving | Simulation | Experienced | 67 | SAGAT | By Level | 1 | 1 | Sensitive to presence of cyclist |
| **(Jeon, Walker, & Gable, 2014)** | Driving | Simulation | Experienced | 35 | End of trial queries | Combined | 0.5 | 0 | Marginal sensitivity to anger |
| **(Jipp & Ackerman, 2016)** | ATC | Simulation | Students | 57 | SAGAT | By Level | 1 | 1 | Sensitive to automation |
| **(Johannsdottir & Herdman, 2010)** | Driving | Simulation | Experienced | 18 | End of trial queries | By Query | 1 | 0 | Sensitive to vehicle position and secondary tasking |
| **(Johannsdottir & Herdman, 2010)** | Driving | Simulation | Experienced | 24 | End of trial queries | By Query | 1 | 0 | Sensitive to vehicle position and secondary tasking |
| **(Jones & Endsley, 2004) also (Jones & Endsley, 2000)** | Military | Simulation | Experienced | 20 | SAGAT | By Query | 1 | 1 | Sensitive to scenario differences |
| **(Jones, Quoetone, Ferree, Magsig, & Bunting, 2003)** | Other | Simulation | Experienced | 28 | SAGAT | By Query | 1 | 1 | Sensitive to experience types |
| **(Joshi, 2018)** | Medical | Simulation | Novice | 46 | SAGAT | Combined | 0 | 0 | Not sensitive to scenario differences |
| **(Kaber & Endsley, 2004)** | Experi-mental | Microworld | Students | 30 | SAGAT | By Level | 1 | 1 | Sensitive to automation conditions |
| **(Kaber, Perry, Segall, McClernon, & Prinzel III, 2006)** | Experi-mental | Microworld | General | 8 | SALSA | SALSA | 1 | 0 | Sensitive to automation conditions |
| **(Kaber, Sangeun, Zahabi, & Pankok, 2016)** | Driving | Simulation | Experienced | 16 | SAGAT | Combined | 1 | 0 | Sensitive to secondary tasking and hazardous event exposure |
| **(Kaber, Onal, & Endsley, 2000)** | Other | Simulation | Students | 10 | SAGAT | By Level | 1 | 1 | Sensitive to automation conditions |
| **(Kaber, Wright, & Sheik-Nainar, 2006)** | Other | Microworld | Students | 32 | SAGAT | Combined | 1 | 0 | Sensitive to automation conditions |
| **(Kass, Cole, & Stanny, 2007)** | Driving | Simulation | Novice & Experienced | 49 | SAGAT | Combined | 1 | 0 | Sensitive to experience level and cell phone usage |
| (**Kass, VanWormer, Mikulas, Legan, & Bumgarner, 2011)** | Driving | Simulation | Experienced | 16 | SAGAT | Combined | 1 | 0 | Sensitive to training condition |
| **(Kim & Kaber, 2009) also (Kim & Kaber, 2014)** | Aviation | Simulation | Experienced | 8 | SAGAT | Combined | 1 | 0 | Sensitive to display conditions |
| **(Koch et al., 2013)** | Medical | Simulation | Experienced | 12 | SAGAT | Combined | 1 | 0 | Sensitive to display conditions |
| **(Lancaster & Casali, 2008)** | Aviation | Simulation | Experienced | 16 | SAGAT | By Query | 1 | 1 | Sensitive to data-link flight conditions |
| **(Lee, Gore, & Campbell, 1999)** | Driving | Simulation | Experienced | 32 | SAGAT | Combined | 1 | 0 | Sensitive to information availability and age |
| **(Leggatt, 2004)** | Military | Simulation | Experienced | 105 | QUASA | QUASA | 1 | 0 | Sensitive to differences in sites, and functional groups |
| **(Li, Sanderson, Memisevic, & Wong, 2007)** | Process control | Simulation | Experienced | 6 | End of trial queries | By Level | 1 | 0 | Sensitive to display conditions |
| **(Liang, 2010)** | Other | Live Exercises | Experienced | 49 | End of trial queries | Combined | 1 | 0 | Sensitive to display conditions |
| **(Lichacz, Cain, & Patel, 2003)** | ATC | Simulation | General | 32 | SAGAT | By Query | 1 | 1 | Sensitive to perceptual and temporal demand |
| **(Lin, 2010)** | Process control | Simulation | Students | 20 | SAGAT | By Query | 1 | 1 | Sensitive to automation conditions |
| **(Lin et al., 2012)** | Aviation | Simulation | Experienced | 8 | SAGAT | By Level | 1 | 0 | Sensitive to datalink type by phase of flight interactions |
| **(Luz et al., 2014)** | Medical | Simulation | Experienced | 7 | SAGAT | By Query | 0 | 1 | Not sensitive |
| **(Ma & Kaber, 2005)** | Driving | Simulation | Experienced | 18 | End of trial queries | By Level | 1 | 0 | Sensitive to automation and cell phone use |
| **(Ma & Kaber, 2007)** | Driving | Simulation | Experienced | 20 | SAGAT | By Level | 1 | 1 | Sensitive to navigational aid |
| **(Manzey et al., 2011)** | Medical | Simulation | Novice | 14 | SAGAT | By Query | 1 | 1 | Sensitive to automated navigation support (SA of anatomy) |
| **(McClernon, Kaber, Perry, & Segall, 2006)** | Experimental | Microworld | General | 8 | SAGAT | By Level | 1 | 1 | Sensitive to automation mode (L3 SA); L1, L2, overall combined scores not sensitive |
| **(McGeorge et al., 2015)** | Medical | Simulation | Experienced | 32 | SAGAT | By Query | 0 | 1 | Not sensitive to display conditions |
| **(Metzger & Parasuraman, 2001)** | ATC | Simulation | Experienced | 18 | End of trial queries | By Query | 1 | 0 | Marginal sensitivity to automation |
| **(Motz et al., 2009)** | Other | Simulation | Experienced | 26 | SAGAT | By Level | 1 | 1 | Sensitive to display design |
| **(Müller, Manzey, Schreiter, & Luckner, 2015)** | Aviation | Simulation | Experienced | 7 | End of trial queries | Combined | 0 | 0 | Not sensitive to display conditions |
| **(Naderpour, Lu, & Zhang, 2016)** | Process control | Simulation | Experienced | 10 | SAGAT | Combined | 1 | 0 | Sensitive to display design |
| **(Nunes, 2003)** | ATC | Simulation | Novice | 20 | SAGAT | By Query | 0.5 | 1 | Sensitive to workload, not to display differences |
| **(Oberheid, Weber, & Rudolph, 2009)** | ATC | Microworld | Novice | 10 | SAGAT | Combined | 1 | 0 | Sensitive to display type |
| **(O'Meara et al., 2015)** | Medical | Live Exercises | Novice | 39 | End of trial queries | Combined | 1 | 0 | Improvement in SA over 3 scenarios; sensitive to between group differences |
| **(Parush, Hazan, & Shtekelmacher, 2017)** | Other | Microworld | General | 42 | SAGAT | By Level | 1 | 1 | Sensitive to individual vs team conditions |
| **(Parush & Rustanjaja, 2013)** | Other | Microworld | General | 42 | SAGAT | Combined | 1 | 0 | Sensitive to information completeness |
| **(Parush, 2017)** | Medical | Simulation | Experienced | 13 | SAGAT | By level | 1 | 1 | Sensitive to display conditions |
| **(Pennathur, 2011)** | Medical | Simulation | Experienced | 17 | SAGAT | Combined | 1 | 0 | Sensitive to experience type |
| **(Perry, Sheik-Nainar, Segall, Ma, & Kaber, 2008)** | Military | Simulation | Students | 16 | SAGAT | By Level | 1 | 1 | Sensitive to physical workload |
| **(Puuska, 2018)** | Other | Simulation | Novice | 13 | SAGAT | By level | 0 | 1 | Not sensitive |
| **(Price, Tenan, Head, Maslin, & LaFiandra, 2016)** | Military | Simulation | General | 21 | QUASA | QUASA | 1 | 0 | Sensitive to stress manipulation |
| **(Radlmayr, Brüch, Schmidt, Solbeck, & Wehner, 2018)** | Driving | Simulation | Experienced | 57 | SAGAT | Combined | 1 | 0 | Sensitive to automation monitoring conditions |
| **(Randel, Pugh, & Reed, 1996)** | Military | Simulation | Novice & Experienced | 28 | SAGAT | By Query | 1 | 1 | Sensitive to experience level and emitter type |
| **(Riley & Kaber, 2001) also (Riley, Kaber, & Draper, 2004)** | Robotics | Simulation | Students | 24 | SAGAT | Combined | 0.5 | 0 | Moderately sensitive to level of difficulty manipulations |
| **(Riley & Strater, 2006)** | Robotics | Simulation | Students | 20 | SAGAT | By Query | 1 | 1 | Sensitive to control mode |
| **(Riley et al., 2008)** | Robotics | Simulation | Students | 24 | SAGAT | By Query | 1 | 1 | Sensitive to control mode |
| **(Riley, Scielzo, Hyatt, Davis, & Colombo, 2009)** | Robotics | Simulation | Students | 24 | SAGAT | Combined | 1 | 0 | Sensitive to control mode and communications differences |
| **(Rose, Bearman, & Dorrian, 2018)** | Other | Simulation | Experienced & Students | 49 | SAGAT | Combined | 1 | 0 | Sensitive to experience by trial interaction |
| **(Ross, Barnett, & Meliza, 2007)** | Military | Simulation | Experienced & Students | 26 | SAGAT | Combined | 1 | 0 | Sensitive to task difficulty |
| **(Schaffer, 2018)** | Other | Microworld | General | 901 | SAGAT | By Level | 1 | 1 | Sensitive to display conditions |
| **(Selkowitz, Lakhmani, Chen, & Boyce, 2015)** | Military | Microworld | General | 45 | SAGAT | By Query | 1 | 1 | Sensitive to transparency conditions |
| **(Selkowitz, Lakhmani, Larios, & Chen, 2016) also (Selkowitz, 2017)** | Robotics | Microworld | General | 60 | SAGAT | By Level | 1 | 1 | Sensitive to display conditions |
| **(Sethumadhavan, 2009)** | ATC | Microworld | General | 72 | SAGAT | Combined | 1 | 0 | Sensitive to automation conditions |
| **(Sethumadhavan, 2011)** | ATC | Microworld | Students | 72 | SAGAT | Combined | 1 | 0 | Sensitive to level of automation conditions and automation failures |
| **(Silva, Grigoleit, Ann Burress, & Fitzpatrick, 2017)** | Process control | Simulation | Experienced | 11 | SAGAT | Combined | 0 | 0 | Not sensitive to experience level |
| **(Smets, te Brake, Lindenberg, & Neerincx, 2007)** | Other | Microworld | Students | 20 | SAGAT | By Query | 1 | 1 | Sensitive to display conditions |
| **(Snow & Reising, 1999)** | Aviation | Simulation | Experienced | 12 | SAGAT | By Query | 1 | 0 | Sensitive to display conditions |
| **(Snow & French, 2002)** | Aviation | Simulation | Experienced | 13 | SAGAT | Combined | 1 | 0 | Sensitive to visibility differences; not sensitive to display differences |
| **(Soliman & Mathna, 2009)** | Driving | Simulation | Novice & Experienced | 56 | SAGAT | Combined | 1 | 0 | Sensitive to experience level and training |
| **(Soliman, 2010)** | Driving | Simulation | Experienced | 40 | SAGAT | Combined | 1 | 0 | Sensitive to scenario difficulty and individual differences in executive function |
| **(Strater, Endsley, Pleban, & Matthews, 2001)** | Military | Simulation | Novice & Experienced | 14 | SAGAT | By Query | 1 | 1 | Sensitive to experience levels and scenarios |
| **(Strater et al., 2004)** | Military | Live Exercises | Novice | 50 | SAGAT | By Query | 1 | 1 | Sensitive to training conditions |
| **(Strater, Faulkner, Hyatt, & Endsley, 2006)** | Military | Simulation | Students | 16 | SAGAT | By Level | 1 | 1 | Sensitive to display type |
| **(Strater et al., 2010)** | Military | Simulation | Experienced | 60 | SAGAT | By Level | 1 | 1 | Sensitive to changes over time |
| **(Stratton, Furey, & Hogan, 2014)** | Medical | Simulation | Novice | 9 | SAGAT | Combined | 0 | 0 | Not sensitive to fatigue levels |
| **(Taylor, 2016)** | Driving | Live exercises | Experienced | 62 | End of trial queries | By Level | 1 | 0 | Sensitive to individual differences |
| **(Tharanathan, Laberge, Bullemer, Reising, & McLain, 2010)** | Process control | Simulation | Experienced | 18 | SAGAT | By Level | 1 | 1 | Sensitive to display type and scenario complexity |
| **(Tharanathan, Bullemer, Laberge, Reising, & Mclain, 2012)** | Process control | Microworld | Experienced | 18 | SAGAT | By Level | 1 | 1 | Sensitive to display conditions and scenario type |
| **(Tremblay, Vachon, Rousseau, & Breton, 2012)** | Military | Simulation | Students | 43 | QUASA | QUASA | 1 | 0 | Sensitive to display differences |
| **(Trujillo, 2004)** | Aviation | Simulation | Experienced | 12 | End of trial queries | Combined | 1 | 0 | Sensitive to event type |
| **(Tumkaya et al., 2013)** | Experi-mental | Microworld | Experienced | 84 | SAGAT | Combined | 1 | 0 | Sensitive to clinical conditions between participants |
| **(Vachon, Lafond, Vallieres, Rousseau, & Tremblay, 2011)** | Military | Microworld | General | 63 | QUASA | QUASA | 1 | 0 | Sensitive to display differences |
| **(Van den Beukel, 2016)** | Driving | Simulation | Experienced | 37 | SAGAT | By level | 1 | 1 | Sensitive to display differences |
| **(Van den Beukel, 2017)** | Driving | Simulation | Experienced | 24 | SAGAT | By level | 1 | 1 | Sensitive to display differences |
| **(Ventsislavova, 2016)** | Driving | Video | Novice & Experienced | 143 | SAGAT | By level | 1 | 0 | Sensitive to experience levels and type |
| **(Ventsislavova, 2019)** | Driving | Video | Novice & Experienced | 153 | SAGAT | By level | 1 | 0 | Sensitive to experience levels |
| **(Walker, Stanton, & Young, 2008) also (Walker, Stanton, & Young, 2006)** | Driving | Simulation | Experienced | 35 | SAGAT | d’ sensitivity and confi-dence level | 1 | 0 | Sensitive to feedback conditions |
| **(Weber, Oberheid, & Papenfuss, 2013)** | ATC | Microworld | Students | 78 | SAGAT | By Level | 1 | 1 | Sensitive to visual aiding condition |
| **(Wei, Zhuang, Wanyan, & Wang, 2013)** | Aviation | Simulation | Students | 30 | SAGAT | Combined | 1 | 0 | Sensitive to display type |
| **(Weiler, 2018)** | Medical | Simulation | Students | 69 | End of trial queries | Combined | 0 | 0 | Not sensitive to role assignment |
| **(Willems & Heiney, 2001)** | ATC | Simulation | Experienced | 16 | End of trial queries | By Query | 1 | 0 | Sensitive to automation conditions |
| **(Willems & Heiney, 2001)** | ATC | Simulation | Experienced | 16 | SAVANT | SAVANT | 0.5 | 0 | Partially sensitive to automation conditions |
| **(Wolf, 2018)** | Other | Live Exercises | General | 27 | SAGAT | By level | 1 | 1 | Sensitive to exertion conditions |
| **(Wright, Kaber, & Endsley, 2003)** | Aviation | Simulation | Novice & Experienced | 16 | SAGAT | By Level | 1 | 1 | Sensitive to scenario manipulation, marginally sensitive to automation conditions |
| **(Wright, 2015)** | Aviation | Simulation | Students | 62 | SAGAT | By level | 0 | 1 | Not sensitive to display conditions |
| **(Wu, 2016)** | Process Control | Simulation | Students | 48 | SAGAT | Combined | 1 | 0 | Sensitive to display conditions and alarm frequency |
| **(Wulf, Zeeb, Rimini-Doring, Arnon, & Gauterin, 2013)** | Driving | Simulation | Experienced | 90 | SAGAT | Combined | 1 | 0 | Sensitive to display differences and secondary tasks |
| **(Zhang et al., 2002)** | Medical | Simulation | Experienced & Students | 24 | SAGAT | By Level | 1 | 1 | Sensitive to display type |
| **(Zhang, Kaber, & Hsiang, 2010)** | Other | Simulation | Students | 12 | SAGAT | By Level | 1 | 1 | Sensitive to mental model differences |

# Appendix B: SPAM Sensitivity Studies

| **(Alexander & Wickens, 2005)** | Aviation | Simulation | Experienced | 24 | SPAM | 1 | Sensitive to display differences |
| --- | --- | --- | --- | --- | --- | --- | --- |
| **(Burns, et al., 2008)** | Process Control | Simulation | Experienced | 6 | Real time probes | 1 | Imbedded probes (L2 and L3) sensitive to interface type, scenarios and phase and interaction |
| **(Chen, Loft, Huf, Braithwaite, & Visser, 2014)** | Submarine Manage-ment | Microworld | Students | 38 | SPAM | 0 | Not sensitive to automation condition |
| **(Cummings & Guerlain, 2007)** | Military | Simulation | Experienced | 42 | Real time probes | 1 | Sensitive to session and number of missiles |
| **(Dao et al., 2009)** | Aviation | Simulation | Experienced | 17 | Real time probes | 1 | Sensitive to automation condition |
| **(Dao et al., 2011)** | Aviation | Simulation | Experienced | 8 | SPAM | 1 | Sensitive to automation condition |
| **(Dattel et al., 2011)** | Driving | Videos | Students | 34 | Real time probes | 1 | Speed of answering irrelevant questions sensitive to inattentional blindness |
| **(Dattel et al., 2012)** | Driving | Videos | Students | 82 | Real time probes | 1 | RT sensitive to working memory differences on irrelevant questions, but not relevant questions |
| **(Dattel et al., 2013)** | Aviation | Simulation | Experienced | 20 | Real time probes | 1 | Accuracy and RT sensitive to training conditions |
| **(Dattel, Battle, Stefonetti, Bifano, & Majdic, 2015)** | Driving | Videos | Students | 27 | Real time probes | 1 | RT sensitive to differences in inattentional insensitivity |
| **(Dattel et al., 2018)** | Driving | Videos | Students | 33 | Real time probes | 1 | Accuracy sensitive to differences in inattentional insensitivity |
| **(Edwards, 2016)** | ATC | Simulation | Experienced | 8 | SPAM | 1 | RT sensitive to automation conditions |
| **(Endsley, 2017)** | Driving | Live exercise | Experienced | 1 | Real time probes | 0 | Not sensitive to automation differences (accuracy only) |
| **(Hanratty et al., 2009)** | Military | Simulation | Students | 32 | Real time probes | 0 | Not sensitive to display type |
| **(Jones & Endsley, 2004) also (Endsley, Sollenberger, Nakata, Hough, & Stein, 1999)** | ATC | Simulation | Experienced | 10 | Real time probes | 0 | Real time probes not sensitive to display conditions |
| **(Jones & Endsley, 2004)** | Military | Simulation | Experienced | 20 | Real time probes | 1 | Real time probe accuracy and RT sensitive across scenarios |
| **(Kaber, Riley, Sheik-Nainar, Hyatt, & Reynolds, 2006) also (Kaber et al., 2013)** | Military | Simulation | Experienced | 27 | Real time probes | 0 | Not sensitive to scenario or team |
| **(Kaber, Zhang, Jin, Mosaly, & Garner, 2012)** | Driving | Simulation | Experienced | 20 | Real time probes | 1 | Accuracy sensitive to differences in age and hazard events |
| **(Koch, et al., 2013)** | Medical | Live exercise | Experienced | 8 | Real time probes | 1 | Sensitive to display differences |
| **(Loft et al., 2016)** | Submarine Manage-ment | Microworld | Students | 50 | SPAM | 1 | Sensitive to effects of uncertainty and performance |
| **(Loft, et al., 2016)** | Submarine Manage-ment | Simulation | Experienced | 16 | SPAM | 0 | Not sensitive to uncertainty and not significantly predictive of performance |
| **(Noah, 2017)** | Process Control | Simulation | Students | 20 | SPAM | 0 | No sensitive to display differences |
| **(Schuster, Keebler, Jentsch, & Zuniga, 2012)** | Robotics | Microworld | Students | 53 | SPAM | 1 | Sensitive to differences in mission but not information condition |
| **(Silva, et al., 2017)** | Process Control | Simulation | Experienced | 11 | SPAM | 1 | Less experienced had better accuracy |
| **(Strybel, Vu, Battiste, & Johnson, 2013) also (Strybel et al., 2010)** | Aviation | Simulation | Experienced | 8 | SPAM | 1 | Sensitive to operational concept |
| **(Strybel et al., 2016)** | ATC | Simulation | Students | 24 | SPAM | 0 | Not sensitive to automation condition, traffic density, or reliability |

# Appendix C: Predictiveness of SA Metrics

| **Paper** | **Domain** | **Environment** | **Subjects** | **Number** | **Measure** | **Predictive** | **Mean Pearson's R** | **Findings** |
| --- | --- | --- | --- | --- | --- | --- | --- | --- |
| **(Bacon & Strybel, 2013)** | ATC | Simulation | Novice | 12 | SPAM | 1 | 0.324 | Predictive of performance |
| **(Chauvin, Clostermann, & Hoc, 2008)** | Ship Navigation | Simulation | Novice | 90 | SAGAT | 1 | --- | Predictive of decision differences |
| **(Cooper, et al., 2010)** | Health Care | Live Exercises | Novice | 51 | SAGAT | 0.5 | --- | Moderate correlation with subjective performance rating |
| **(Cummings & Guerlain, 2007)** | Military | Simulation | Experienced | 42 | SPAM | 1 | 0.432 | Predictive of performance |
| **(Durso et al., 1998)** | ATC | Simulation | Experienced | 12 | SPAM | 1 | 0.545 | SPAM provided additional sensitivity |
| **(Durso, et al., 1998)** | ATC | Simulation | Experienced | 12 | SAGAT | 1 | 0.617 | Predictive of performance |
| **(Durso, Bleckley, & Dattel, 2006)** | ATC | Microworld | Students | 88 | SPAM | 1 | 0.344 | SPAM added 9% to prediction of 2 individual performance measures (9% and 15%) over cognitive battery |
| **(Durso, et al., 2006)** | ATC | Microworld | Students | 88 | SAGAT | 0.5 | 0.140 | SAGAT added to prediction of 1 individual performance measure (2%) over cognitive battery (only 1 query/stop) |
| **(Endsley, 1990b)** | Military aviation | Simulation | Experienced | 25 | SAGAT | 1 | --- | SAGAT predictive of performance |
| **(Entin, 2000)** | Helicopter | Simulation | Experienced | 24 | SAGAT | 1 | 0.443 | Predictive of performance in all 3 mission phases |
| **(Gatsoulis, Virk, & Dehghani-Sanij, 2010)** | Robot Control | Simulation | Naive | 32 | SAGAT | 1 | 0.447 | Predictive of performance |
| **(Gugerty, 1997)** | Driving | Simulation | Experienced | 34 | SAGAT | 1 | 0.466 | Predictive of performance |
| **(Gutzwiller & Clegg, 2012)** | Network Fire Chief | Microworld | Students | 119 | End of Trial | 1 | 0.650 | Predictive of performance (L3) |
| **(Hamilton, Mancuso, Mohammed, Tesler, & McNeese, 2017)** | Neocities - Emergency Response | Microworld | Students | 216 | SAGAT | 1 | 0.350 | Predictive of performance |
| **(Hogan, et al., 2006)** | Trauma life support | Simulation | Novice to Experienced | 16 | SAGAT | 1 | 0.806 | Predictive of expertise and performance scores |
| **(Ikuma, et al., 2014)** | Process control | Simulation | Students | 10 | SAGAT | 1 | --- | SA and workload interaction predictive of performance |
| **(Jannat, 2018)** | Driving | Simulation | Experienced | 67 | SAGAT | 1 | 0.3 | Predictive of performance |
| **(Jipp & Ackerman, 2016)** | ATC | Simulation | Students | 57 | SAGAT | 1 | 0.315 | Predictive of performance |
| **(Jones & Endsley, 2004) also (Endsley, Sollenberger, Nakata, & Stein, 2000)** | ATC | Simulation | Experienced | 10 | SAGAT | 1 | 0.301 | Predictive of performance |
| **(Jones & Endsley, 2004) also (Endsley, et al., 2000)** | ATC | Simulation | Experienced | 10 | Real time probes | 0 | 0.000 | Not predictive of performance |
| **(Kaber & Endsley, 2004)** | Multitask | Microworld | Students | 30 | SAGAT | 1 | 0.452 | Predictive of primary task performance |
| **(Kaber, Perry, et al., 2006)** | Multitask | Microworld | General | 8 | SALSA | 0.5 | 0.202 | Weak correlation with performance |
| **(Kaber, et al., 2016)** | Driving | Simulation | Experienced | 16 | SAGAT | 1 | 0.362 | Predictive of performance |
| **(Kass, et al., 2011)** | Driving | Simulation | Experienced | 16 | SAGAT | 1 | 0.650 | Predictive of performance |
| **(Kraemer, 2015)** | ATC | Simulation | Students | 57 | SAGAT | 0 | --- | Not predictive of performance |
| **(Kraemer, 2015)** | ATC | Simulation | Students | 57 | SPAM | 1 | --- | Predictive of performance |
| **(Li, et al., 2007)** | Hydro Power Control Room | Simulation | Experienced | 6 | End of Trial | 1 | --- | Sensitive to display conditions |
| **(Lo, Sehic, Brookhuis, & Meijer, 2016)** | Train Driving | Simulation | Experienced | 22 | SAGAT | 0 | 0.000 | Not predictive of performance |
| **(Loft, Morrell, & Huf, 2013)** | Submarine Management | Microworld | Students | 55 | SPAM | 1 | 0.463 | Moderate correlation with performance |
| **(Loft et al., 2015)** | Submarine | Microworld | Students | 171 | SAGAT | 1 | 0.349 | SAGAT accounted for 2x the variance of SPAM, predicted more performance measures |
| **(Loft, et al., 2016)** | Submarine Management | Microworld | Students | 50 | SPAM | 1 | 0.585 | Predictive of performance |
| **(Loft et al., 2018)** | Submarine Management | Microworld | Students | 59 | SAGAT | 1 | 0.345 | Correlated with Performance |
| **(Ma & Kaber, 2005)** | Driving | Simulation | Experienced | 20 | SAGAT | 1 | 0.605 | Predictive of performance |
| **(McDermott & Fisher, 2013)** | Robot | Microworld | General | 39 | End of Trial | 1 | 0.392 | Sensitive to performance differences |
| **(McGowan & Banbury, 2004)** | Driving Hazard Anticipation | Videos | Experienced | 152 | SAGAT | 1 | 0.557 | Correlated with hazard perception |
| **(McKenna et al., 2014))** | Nursing | Live Exercises | Novice | 97 | End of Trial | 1 | --- | Correlated with performance differences |
| **(O'Brien & O'Hare, 2007)** | ATC | Microworld | Students | 20 | SAGAT | 1 | 0.575 | SAGAT predictive of performance; Combined Score |
| **(Paletta et al., 2017)** | Robot | Simulation | General | 19 | SAGAT | 1 | 0.608 | Predictive of performance |
| **(Pierce, Strybel, & Vu, 2008)** | ATC | Microworld | Students | 21 | SAGAT | 0.5 | 0.391 | Correlated with performance |
| **(Pierce, Strybel, et al., 2008)** | ATC | Microworld | Students | 21 | SPAM | 1 | 0.518 | Correlated with performance |
| **(Prince, Ellis, Brannick, & Salas, 2007)** | Aviation | Simulation | Novice | 41 | SAGAT | 1 | 0.410 | Predictive of performance |
| **(Puuska, 2018)** | Network Monitoring | Simulation | Novice | 13 | SAGAT | 1 | 0.6315 | Predictive of performance with new display |
| **(Salmon et al., 2009)** | Military planning | Microworld | Students | 20 | SAGAT | 1 | --- | SAGAT predictive of performance |
| **(Sethumadhavan, 2011)** | ATC | Microworld | Students | 72 | SAGAT | 1 | 0.488 | Predictive of performance |
| **(Soliman, 2010)** | Driving | Simulation | Experienced | 40 | SAGAT | 1 | --- | Predictive of driving violations |
| **(Stanners & French, 2005)** | Military - Operation Flashpoint | Game | Experienced | 24 | SAGAT | 1 | 0.450 | Predictive of decision making and planning scores |
| **(Strybel, Vu, Kraft, & Minakata, 2008)** | Aviation | Simulation | Experienced | 13 | SPAM | 1 | 0.283 | Predictive of performance . SPAM every 2 minutes |
| **(Strybel, et al., 2008)** | Aviation | Simulation | Experienced | 13 | SAGAT | 0.5 | 0.265 | Predictive of performance . 2 SAGAT/trial, 30 minute trials |
| **(Strybel, Minakata, Nguyen, Pierce, & Vu, 2009)** | ATC | Simulation | Novice and Experienced | 16 | SPAM | 1 | --- | Some queries not answered, presumably due to workload |
| **(Strybel, et al., 2013)** | Aviation | Simulation | Experienced | 8 | SPAM | 1 | 0.323 | SPAM predictive of performance (conflict resolution time) |
| **(Sulistayawati, Wickens, & Chui, 2011)** | Military Aviation | Game | Experienced | 16 | SAGAT | 1 | 0.690 | SA and overconfidence predicted 57% of variance in performance |
| **(Zhang, et al., 2010)** | Security patrol | Simulation | Students | 12 | SAGAT | 1 | 0.407 | SAGAT predictive of performance |

# Appendix D: Intrusiveness of SA Metrics

| **Study** | **Domain** | **Environment** | **Subjects** | **SAGAT** | **SPAM** | **Notes** |
| --- | --- | --- | --- | --- | --- | --- |
| **(Durso, et al., 1998)** | ATC | Microworld | Students | No effect on performance | No effect on performance | Only 1 SAGAT question/stop |
| **(Durso, et al., 2006)** | ATC | Microworld | Students | No effect on performance or workload | No effect on performance or workload | Only 1 SAGAT question/stop |
| **(Bacon & Strybel, 2013)** | ATC | Simulation | Novice | ---- | No effect on performance or workload | Trend towards faster RT on conflicts of probed aircraft |
| **(Endsley, 1995)** | Aviation | Simulation | Experienced | No effect on performance | --- | 0, 1, 2 or 3 stops of 30, 60 or 120 seconds |
| **(Endsley, 2000)** | Aviation | Simulation | Experienced | No effect on performance | --- | Performance not effected by SAGAT stop or by possibility of SAGAT stop |
| **(Hogg, et al., 1995)** | Nuclear Power | Simulation | Experienced | No effect on performance | --- | (SACRI) Subjective performance |
| **(Keeler et al., 2015)** | ATC | Simulation | Novice |  | No effect on performance | Computer version of SPAM |
| (Kraemer, 2015) | ATC | Simulation | Students | Improved performance | No effect on performance | Confounded with order effect (learning) |
| **(Loft, et al., 2015)** | Submarine | Microworld | Students | Small effect on workload | No effect on performance or workload | More queries with SAGAT (2% increase in workload) |
| **(Loft, et al., 2016)** | Submarine | Microworld | Experienced & Students | --- | Negative effect on performance | Experts took almost 20 seconds to accept SPAM queries – longer when SA lower and uncertainty higher |
| **(Morgan, Chiappe, Kraut, Strybel, & Vu, 2012)** | ATC | Microworld | Novices | No effect on workload | No effect on workload |  |
| **(Pierce, 2012)** | ATC | Microworld | Students | --- | Negative effect on performance & workload |  |
| **(Pierce, Vu, Nguyen, & Strybel, 2008)** | ATC | Microworld | Students | --- | Negative effect on performance |  |
| **(Pierce, Strybel, et al., 2008)** | ATC | Microworld | Students | No effect on performance | Negative effect on performance | SAGAT end of trial |
| **(Shelton, Kinston, Molyneux, & Ambrose, 2013)** | Health Care | Simulation | Novice | --- | Negative effect on discussion | Verbal queries viewed as intrusive, confused with dialog |
| **(Silva et al., 2013)** | ATC | Simulation | Novice | --- | No effect on performance | Computer version of SPAM |
| **(Snow & Reising, 1999)** | Aviation | Simulation | Experienced | No effect on performance | No effect on performance |  |
| **(Strybel, et al., 2008)** | Aviation | Simulation | Experienced | No effect on performance | Negative effect on performance | Performance worse on SPAM trials compared to SAGAT trials |

# Appendix E. Other Papers Relevant to Methodology

| **Paper** | **Domain** | **Environment** | **Subjects** | **Number** | **Measure** | **Topic** | **Findings** |
| --- | --- | --- | --- | --- | --- | --- | --- |
| **(Durso, et al., 2006)** | ATC | Microworld | Students | 88 | SAGAT | Memory | SAGAT correlated with complex working memory (operational word span and reading span) and fluid intelligence (only 1 query/stop). Measures of short term memory and visual memory were not correlated with SAGAT |
| **(Cak, Say, & Misirlisoy, 2019)** | Aviation | Simulation | Experienced | 36 | SAGAT; SPAM | Memory | Both SAGAT and SPAM correlated with Operation Span measure of complex working memory |
| **(Endsley, 1990a) also (Endsley, 1995)** | Military aviation | Simulation | Experienced | 10 | SAGAT | Memory | SA information available from LTM for at least 5-6 minutes after SAGAT freeze without memory decay |
| **(Endsley & Bolstad, 1994)** | Military aviation | Simulation | Experienced | 21 | SAGAT | Memory | Working memory test (immediate/delayed memory) not correlated with SAGAT |
| **(Gonzalez & Wimisberg, 2007)** | Water Purification Plant | Microworld | General | 36 | SAGAT | Memory | Task initially required visual working memory (visual span), but declined over time |
| **(Gonzalez & Wimisberg, 2007)** | Water Purification Plant | Microworld | General | 36 | SA queries (with information showing) | Memory | Did not require visual working memory (visual span); relied on looking on the screen; did not improve with practice |
| **(Gutzwiller & Clegg, 2012)** | Fire control | Microworld | Students | 118 | SAGAT (End of trial) | Memory | No relationship between complex working memory (arrow, symmetry and reading span) and Level 1 SA, positive relationship with Level 3 SA |
| **(Jipp & Ackerman, 2016)** | ATC | Simulation | Students | 57 | SAGAT | Memory | Primary working memory (dot span and figural task switching) not correlated with SAGAT |
| **(Kass, et al., 2007)** | Driving | Simulation | Novice and Experienced | 49 | SAGAT | Memory | Experienced participants had higher SAGAT scores than inexperienced participants |
| **(Strater, et al., 2001)** | Military | Simulation | Novice and Experienced | 14 | SAGAT | Memory | Experienced participants had higher SAGAT scores than inexperienced participants, and paid attention to different things |
| **(Sulistayawati, et al., 2011)** | Military Aviation | Microworld | Experienced | 16 | SAGAT | Memory | Primary working memory (visual span number, auditory letter span, building memory) not correlated with SAGAT |
| **(Alexander & Wickens, 2004)** | Aviation | Static images | Experienced | 12 | Display blanked vs Display present | Speed Accuracy Trade-off | Speed accuracy tradeoffs for memory based response vs when info is present |
| **(Alexander & Wickens, 2005)** | Aviation | Simulation | Experienced | 24 | SAGAT/SPAM | Speed Accuracy Trade-off | Response time 2 seconds faster with SAGAT than SPAM, but less accurate (speed accuracy tradeoff) |
| **(Jones & Endsley, 2004)** | Military air defense | Simulation | Experienced | 20 | SAGAT/SPAM | Speed Accuracy Trade-off | SPAM produces speed-accuracy tradeoff - faster responses with lower accuracy (p=.07) |
| **(Morgan, et al., 2012)** | ATC | Microworld | Novice | 14 | SAGAT/SPAM | Speed Accuracy Trade-off | Information visibility (SPAM) results in speed-accuracy tradeoff compared to when blanked (SAGAT) |
| **(Taber, 2013)** | Emergency Response | Simulaiton | General | 23 | SAGAT/SPAM | Speed Accuracy Trade-off | Slower to respond to SPAM compared to SAGAT due to visually confirming responses |
| **(Cunningham, 2015)** | Aviation | Simulation | Experienced | 35 | SPAM | Workload | Did not respond to ready prompt 16% of the time (due to workload) and did not respond to probe 2.8% |
| **(Durso, et al., 1998)** | ATC | Simulation | Experienced | 12 | SPAM | Workload | Subjects delay answering probes as long at 10 seconds |
| **(Jones & Endsley, 2004)** | ATC | Simulation | Experienced | 10 | Real time probes | Workload | Weak correlation with workload |
| **(Loft, et al., 2016)** | Submarine Management | Microworld | Students | 50 | SPAM | Workload | Participants took as along as 20 seconds to accept queries, taking longer when SA was low or uncertainty was high |
| **(Pierce, 2012)** | ATC | Microworld | Students | 21 | SPAM | Workload | Higher workload with SPAM |
| **(Shelton, et al., 2013)** | Medical Care | Simulation | Novice | 18 | SPAM | Workload | Verbal queries intrusive, confused with dialog; adopted PDA implementation |
| **(Strybel, et al., 2010)** | Aviation | Simulation | Experienced | 8 | SPAM | Workload | SPAM latency measure correlated with workload |
| **(Strybel, et al., 2008)** | Aviation | Simulation | Experienced | 13 | SPAM | Workload | SPAM latency measure correlated with workload |
| **(Strybel, et al., 2016)** | ATC | Microworld | Students | 24 | SPAM with graphics | Workload | Lower % correct with graphical display of aircraft that questions referred to. Higher probability of being correct due to guessing with traditional SPAM |
| **(Strybel, et al., 2013)** | Aviation | Simulation | Experienced | 8 | SPAM | Workload | Did not respond to 5% of probes |
| **(Trapsilawati, Wickens, Qu, & Chen, 2016)** | ATC | Simulation | Students | 24 | SPAM | Workload | Mean latencies in accepting a SPAM probe of between 9 and 23 seconds |
| **(Lau, Jamieson, & Skraaning Jr, 2014)** | Process control | Simulation | Experienced | 3 | SAGAT | Method | Low inter-rater reliability on queries |
| **(Endsley & Bolstad, 1994)** | Military aviation | Simulation | Experienced | 21 | SAGAT | Method | Highly stable (test-retest .99, .98. .92, .98) |
| **(Jackson, Chapman, & Crundall, 2009)** | Driving | Videos | Novice and Experienced | 79 | Hazard perception | Method | Novices did worse than experienced when the screen was blanked |
| **(McGowan & Banbury, 2004)** | Driving Hazard Anticipation | Videos | Experienced | 152 | SAGAT (by query) | Method | Interruptions with relevant or cueing questions improved hazard detection time, but irrelevant questions negatively affected performance. Passive viewing of 20-25 second videos with 10 second interruptions; non-interrupted trials also improved hazard perception time even more |
| **(Gartenberg, Breslow, McCurry, & Trafton, 2014)** | UAV | Microworld | Students | 27 | SAGAT & interruptions of unrelated tasks | Method | SA comprehension was negatively effected by interruptions of unrelated tasks |

# Appendix F. Studies Investigating Team and Shared SA using Direct Objective SA Measures

| **Paper** | **Domain** | **Environment** | **Subjects** | **Number** | **Measure** | **Team SA Measure** | **Finding** |
| --- | --- | --- | --- | --- | --- | --- | --- |
| **(Artman, 1999)** | Emergency response | Microworld | Students | 60 | SAGAT | Shared SA (similarity) | Negative effect of information overload on teams getting information in parallel compared to in serial; more successful teams crosscheck with each other; Planning important to performance |
| **(Bolstad & Endsley, 2003)** | Military | Simulation | Experienced | 25 | SAGAT | Combined Team SA Score; Shared SA (similarity) | Significant differences in Team SA between teams; Significant challenges in shared SA within teams due to poor collaboration tools |
| **(Bolstad, et al., 2005)** | Military | Simulation | Experienced | 16 | SAGAT | Shared SA (similarity) | Shared knowledge and organizational hub distance predictive of Shared SA |
| **(Bonney, 2016)** | Business | Microworld | Students | 823 | SAGAT | Shared SA similarity (number of matches) | Team performance predicted by Shared SA and Shared strategy. High SA teams benefited from greater variance in SA across the team. |
| **(Brooks, Switzer, & Gugerty, 2003)** | Process control | Simulation | Experienced | 24 | SAGAT | Combined Team SA Score | Not sensitive to a 5 minute "SA training" video |
| **(Cooke, Stout, Rivera, & Salas, 1998)** | Helicopter | Microworld | Students | 24 | SAGAT, SPAM | Combined Team SA Score | Team Knowledge accuracy predicted Team SA (.762, .781, .772, .690). Team SA also predicted by role knowledge (.677,.676 ) and non-role knowledge (.753). Shared knowledge decreased over time |
| **(Cooke, Kiekel, & Helm, 2001)** | UAV | Simulation | Students | 33 | SPAM | Combined Team SA Score; Shared SA (similarity) | Team performance predicted by Team SA accuracy (r = .88) and SA similarity(r=.22) for L1 and L3 queries |
| **(Coolen, Draaisma, & Loeffen, 2019)** | Medical | Simulation | Experienced | 96 | SAGAT | Shared SA similarity | Consensus on problem and on diagnosis both highly predictive of time to goal achievement |
| **(Crozier et al., 2015)** | Medical | Simulation | Experienced | 12 | SAGAT | Combined Team SA Score; Shared SA; Complimentary SA | Team SA and Complimentary SA higher for more experienced teams; Team SA highly correlated with checklist performance (r = .995) |
| **(Cuevas & Bolstad, 2010)** | Military | Simulation | Experienced | 19 | SAGAT | Team agreement with leader | Team leader SA is significant predictor of Team SA (r = .348) 12% of variance |
| **(Cuevas & Bolstad, 2010)** | Military | Simulation | Experienced | 25 | SAGAT | Team agreement with leader | Too much missing data for analysis, trend towards Team leader SA as predictor of Team SA (r = .612) |
| **(Cuevas & Bolstad, 2010)** | Military | Simulation | Experienced | 6 | SAGAT | Team agreement with leader | Team leader SA is significant predictor of Team SA (r = .698) 49% of variance |
| **(Jones & Endsley, 2002)** | Military | Simulation | Experienced | 10 | SAGAT | Shared SA | Method for determining shared SA from SAGAT scores |
| **(Gardner, Kosemund, & Martinez, 2017)** | Medical Trauma | Simulation | Novices | 43 | SAGAT | Combined Team SA Score | Team SA significantly predicted teamwork ratings for both the first scenario (*F*(1,9)=8.02; *P*<0.05; *R* 2=0.50) and the second (*F*(1,9)=9.94; *P*<0.01; *R* 2=0.55) scenario |
| **(Hallbert, 1997)** | Process Control | Simulation | Experienced | 8 | SACRI | Collaborative Team Response | Teams with low SA had higher variance in SA scores (r= - .7 to- .9); SA at high workload affected by degree of team interaction |
| **(Javed, Norris, & Johnston, 2012)** | Emergency Management | Simulation | Experienced | 16 | SAGAT | Shared SA (SA similarity); Team SA (queries about team member's L2 and L3); Combined scores across all three measures | Individual SA, Shared SA and Team SA all improved by new display concept. Combined scores also improved by display |
| **(Morgan et al., 2015)** | Medical | Simulation | Experienced | 15 | SAGAT | Combined Team SA Score | Correlation with performance (outcome times) in correct direction but not significant |
| **(Parush, et al., 2017)** | fire fighting | Simulator | novices | 42 | SAGAT | Shared SA (similarity and correctness) | SA was higher for individuals working alone than when in teams; Shared SA (both correct) was 41%; non-shared SA was 37.5%; strong relationship between SA and performance, particularly at lower levels of SA |
| **(Price & LaFiandra, 2017)** | Military | Microworld | Experienced | 28 | QUASA | Collaborative Team Response | Stress affected Team SA scores, high stress doubled the level of overconfidence in the teams; higher team engagement lowered stress |
| **(Prince, et al., 2007)** | Aviation | Simulation | Novice | 41 | SAGAT; Implicit performance measure | Combined Team SA Score | Team SA predictive of emergency performance (r = .46). TSA and Implicit behaviors correlated (r = .43) |
| **(Rosenman et al., 2018)** | Medical | Simulation | Novice and Experienced | 123 | Post trial SAGAT - L3 only | Shared SA similarity | Correlated with team performance measure (r=.32) |
| **(Sætrevik, 2012)** | Emergency Handling | Simulation | Experienced | 45 | SAGAT | Team SA Similarity (Team agreement with Leader) | Not sensitive to team membership, numbers of team meetings, or the time since the last meeting |
| **(Saner, Bolstad, Gonzalez, & Cuevas, 2009)** | Military | Simulation | Experienced | 17 | SAGAT | Team SA similarity (agreement and completeness) | Shared knowledge and organizational hub distance were predictive. |
| **(Seet, Teh, Soo, & Teo, 2004)** | Military | Live Exercises | Experienced | 9 | SAGAT | Combined Team SA Score; Shared SA (similarity): Complementary SA (any 1 correct) | No statistics provided; sample size too low |
| **(Sorensen, Stanton, & Banks, 2010)** | Intelligence Analysis | Live Exercises | Students | 34 | SAGAT | Median team SA | Did not discriminate between a hierarchical and peer-to-peer organizational structure |
| **(Sulistyawati, Chui, & Wickens, 2008) also (Sulistyawati, Wickens, & Chui, 2009)** | Military Aviation | Simulation | Experienced | 16 | SAGAT | SAGAT-self; SAGAT-Teammate | SAGAT scores highly predictive of survivability (r=.69) Teams with more overconfidence bias shot at more. (r=.68). SAGAT of own and teammates situation correlated (r=.6, p=.06). Over-confidence bias negatively correlated with SAGAT-self (r=-.85) |
| **(Yuan, 2016)** | Process control | Microworld | Students | 40 | SAGAT | SAGAT-self; SAGAT-Teammate | Strong negative correlation between SA of own tasks and SA of teammates tasks.; SA of teammate improved with display |

References

Alexander, A. L., & Wickens, C. D. (2004). Measuring traffic awareness in an integrated hazard display. Proceedings of the Human Factors and Ergonomics Society Annual Meeting (pp. 171-175). Los Angeles, CA: Sage.

Alexander, A. L., & Wickens, C. D. (2005). Synthetic vision systems: Flightpath tracking, situation awareness, and visual scanning in an integrated hazard display. Proceedings of the International Symposium on Aviation Psychology (pp. 1-6).

Artman, H. (1999). Situation awareness and co-operation within and between hierarchical units in dynamic decision making. Ergonomics, 42(11), 1404-1417.

Bacon, L. P., & Strybel, T. Z. (2013). Assessment of the validity and intrusiveness of online-probe questions for situation awareness in a simulated air-traffic-management task with student air-traffic controllers. Safety Science, 56, 89-95.

Barnes, M. J., McDermott, P. L., Hutchins, S., & Rothrock, L. (2011). Framing, loss aversion, and visualization of risk for a dynamic simulation environment. Journal of Cognitive Engineering and Decision Making, 5(3), 294-308.

Blömacher, K., Nöcker, G., & Huff, M. (2018). The role of system description for conditionally automated vehicles. Transportation Research Part F: Traffic Psychology And Behaviour, 54, 159-170.

Bogossian, F., Cooper, S., Cant, R., Beauchamp, A., Porter, J., Kain, V., . . . Team, F. A. R. (2014). Undergraduate nursing students' performance in recognising and responding to sudden patient deterioration in high psychological fidelity simulated environments: an Australian multi-centre study. Nurse Education Today, 34(5), 691-696.

Bolstad, C. A., Cuevas, H., Gonzalez, C., & Schneider, M. (2005). Modeling shared situation awareness. Paper presented at the 14th Conference on Behavior Representation in Modeling and Simulation (BRIMS) Los Angles, CA.

Bolstad, C. A., & Endsley, M. R. (2003). Measuring shared and team situation awareness in the army's future objective force. Proceedings of the Human Factors and Ergonomics Society 47th Annual Meeting (pp. 364-373). Santa Monica, CA: Human Factors and Ergonomics Society.

Bolstad, C. A., Endsley, M. R., Costello, A. M., & Howell, C. D. (2010). Evaluation of computer based situation awareness training for general aviation pilots. International Journal of Aviation Psychology, 20(3), 269-294.

Bonney, L., Davis-Sramek, B., & Cadotte, E. R. (2016). Thinking” about business markets: A cognitive assessment of market awareness. Journal of Business Research, 69(8), 2641-2648.

Bowden, J. R., & Rusnock, C. F. (2015). Impact of Display Design Individual Preferences on Process Control Performance. Proceedings of the IIE Annual Conference. (pp. 1278). Norcross, GA: Institute of Industrial and Systems Engineers (IISE).

Brooks, J. O., Switzer, F. S., & Gugerty, L. (2003). Effects of situation awareness training on novice process control plant operators. Proceedings of the Human Factors and Ergonomics Society Annual Meeting (pp. 606-609). Los Angeles, CA: Sage.

Buchler, N., Fitzhugh, S. M., Marusich, L. R., Ungvarsky, D. M., Lebiere, C., & Gonzalez, C. (2016). Mission command in the age of network-enabled operations: social network analysis of information sharing and situation awareness. Frontiers in Psychology, 7, 937.

Burns, C. M., Skraaning Jr, G., Jamieson, G. A., Lau, N., Kwok, J., Welch, R., & Andresen, G. (2008). Evaluation of ecological interface design for nuclear process control: situation awareness effects. Human Factors, 50(4), 663-679.

Cak, S., Say, B., & Misirlisoy, M. (2019). Effects of working memory, attention, and expertise on pilots’ situation awareness. Cognition, Technology & Work, 1-10.

Carmody, M. A., & Gluckman, J. P. (1993). Task specific effects of automation and automation failure on performance, workload and situational awareness. Proceedings of the Seventh International Symposium on Aviation Psychology (pp. 167-171). Columbus, OH: Department of Aviation, The Ohio State University.

Catherwood, D., Edgar, G. K., Sallis, G., Medley, A., & Brookes, D. (2012). Fire alarm or false alarm?! Situation awareness and decision-making “bias” of firefighters in training exercises. International Journal of Emergency Services, 1(2), 135-158.

Chancey, E. T., & Bliss, J. P. (2012). Unreliable information in infantry situation awareness: Improvement through game-based training. Simulation & Gaming, 43(5), 581-599.

Chandrasekaran, L., Crookes, A., & Lansdown, T. C. (2019). Driver situation awareness–Investigating the effect of passenger experience. Transportation Research Part F: Traffic Psychology And Behaviour, 61, 152-162.

Chang, A. L., Dym, A., Venegas-Borsellino, C., Bangar, M., Kazzi, M., Lisenenkov, D., . . . Keene, A. (2015). A comparison of simulation training versus classroom-based education in teaching situation awareness: randomized control Study. Chest, 148(4), 461A.

Chang, Y.-L. B., Scott, S. D., & Hancock, M. (2014). Supporting situation awareness in collaborative tabletop systems with automation. Proceedings of the Ninth ACM International Conference on Interactive Tabletops and Surfaces (pp. 185-194). New York: ACM.

Chauvin, C., Clostermann, J., & Hoc, J.-M. (2008). Situation awareness and the decision-making process in a dynamic situation: avoiding collisions at sea. Journal Of Cognitive Engineering And Decision Making, 2(1), 1-23.

Chen, S., Loft, S., Huf, S., Braithwaite, J., & Visser, T. (2014). Static and adaptable automation in simulated submarine track management. Proceedings of the Proceedings of the Human Factors and Ergonomics Society Annual Meeting (pp. 2280-2284). Los Angeles, CA: Sage.

Clark, H., McLaughlin, A. C., & Feng, J. (2017). Situational Awareness and Time to Takeover: Exploring an Alternative Method to Measure Engagement with High-Level Automation. Proceedings of the Human Factors and Ergonomics Society Annual Meeting (pp. 1452-1456). Los Angeles, CA: Sage.

Cooke, N. J., Kiekel, P. A., & Helm, E. E. (2001). Measuring team knowledge during skill acquisition of a complex task. International Journal of Cognitive Ergonomics, 5(3), 297-315.

Cooke, N. J., Stout, R. e., Rivera, K., & Salas, E. (1998). Exploring measures of team knowledge. Proceedings of the Human Factors and Ergonomics Society Annual Meeting (pp. 215-219). Los Angeles, CA: Sage.

Coolen, E., Draaisma, J., & Loeffen, J. (2019). Measuring situation awareness and team effectiveness in pediatric acute care by using the situation global assessment technique. European Journal Of Pediatrics, 1-14.

Cooper, S., Bulle, B., Biro, M. A., Jones, J., Miles, M., Gilmour, C., . . . Scholes, J. (2012). Managing women with acute physiological deterioration: Student midwives performance in a simulated setting. Women and Birth, 25(3), e27-e36.

Cooper, S., Kinsman, L., Buykx, P., McConnell‐Henry, T., Endacott, R., & Scholes, J. (2010). Managing the deteriorating patient in a simulated environment: nursing students’ knowledge, skill and situation awareness. Journal Of Clinical Nursing, 19(15‐16), 2309-2318.

Crooks, C., Hu, C.-Y., & Mahan, R. P. (2001). Cue Utilization and Situation Awareness during a Simulated Experience. Proceedings of the Human Factors and Ergonomics Society Annual Meeting (pp. 1563-1567). Los Angeles, CA: Sage.

Crozier, M. S., Ting, H. Y., Boone, D. C., O’Regan, N. B., Bandrauk, N., Furey, A., . . . Hogan, M. P. (2015). Use of human patient simulation and validation of the Team Situation Awareness Global Assessment Technique (TSAGAT): A multidisciplinary team assessment tool in trauma education. Journal Of Surgical Education, 72(1), 156-163.

Crundall, D. (2016). Hazard prediction discriminates between novice and experienced drivers. Accident Analysis & Prevention, 86(47-58).

Crundall, D., & Kroll, V. . (2018). Prediction and perception of hazards in professional drivers: Does hazard perception skill differ between safe and less-safe fire-appliance drivers? Accident Analysis & Prevention, 121, 335-346.

Cuevas, H. M., & Bolstad, C. A. (2010). Influence of team leaders' situation awareness on their team's situation awareness and performance. Proceedings of the Human Factors and Ergonomics Society Annual Meeting (pp. 309-313). Los Angeles, CA: Sage.

Cummings, M. L., & Guerlain, S. (2007). Developing operator capacity estimates for supervisory control of autonomous vehicles. Human Factors, 49(1), 1-15.

Cunningham, J. C., Henri Battiste, Sam Curtis, Elyse C. Hallett, Martin Koltz, Summer L. Brandt, Joel Lachter, Vernol Battiste, and Walter W. Johnson. (2015). Measuring Situation Awareness with probe questions: Reasons for not answering the probes. Procedia Manufacturing, 3(2982-2989).

D’Aniello, G., Gaeta, A., Gaeta, M., & Tomasiello, S. (2018). Self-regulated learning with approximate reasoning and situation awareness. Journal of Ambient Intelligence and Humanized Computing, 9(1), 151-164.

Dao, A.-Q. V., Brandt, S. L., Bacon, L. P., Kraut, J. M., Nguyen, J., Minakata, K., . . . Johnson, W. W. (2011). Conflict resolution automation and pilot situation awareness. In M. J. Smith & G. Salvendy (Eds.), Human Interface (HCI 2011) (pp. 473-482). Berlin: Springer.

Dao, A.-Q. V., Brandt, S. L., Battiste, V., Vu, K.-P. L., Strybel, T., & Johnson, W. W. (2009). The impact of automation assisted aircraft separation on situation awareness. In M. J. Smith & G. Salvendy (Eds.), Human Interface, Part II (HCI 2009) (pp. 738-747). Berlin: Springer.

Dattel, A. R., Battle, A. N., Stefonetti, M. C., Bifano, M., & Majdic, K. (2015). The Relationship between Inattentional Blindness, Inattentional Insensitivity, Situation Awareness, and Performance in a Driving Simulator. Proceedings of the Human Factors and Ergonomics Society Annual Meeting (pp. 1356-1360). Los Angeles, CA: Sage.

Dattel, A. R., Kossuth, L., Sheehan, C. C., Green, H. J., Giannini, C., Decker, J., . . . Crockett, S. A. (2013). Effects of Conceptual Training and Procedural Training for Teaching Aviation Instrument Holding Patterns. Proceedings of the Human Factors and Ergonomics Society Annual Meeting (pp. 1445-1449). Los Angeles, CA: Sage.

Dattel, A. R., Teodorovic, S., Pruksaritanon, S., Brooks, J., Babin, A. K., Dong, Z., & Shetty, P. (2018). Inattentional Insensitivity as a Predictor of On-Task Performance and Performance in a Subsequent Task. Proceedings of the Human Factors and Ergonomics Society Annual Meeting (pp. 1530-1534). Los Angeles, CA: Sage.

Dattel, A. R., Vogt, J. E., Fratzola, J. K., Dever, D. P., Stefonetti, M., Sheehan, C. C., . . . Cavanagh, J. A. (2011). The gorilla’s role in relevant and irrelevant stimuli in situation awareness and driving hazard detection. Proceedings of the Human Factors and Ergonomics Society Annual Meeting (pp. 924-928). Los Angeles, CA: Sage.

Dattel, A. R., Vogt, J. E., Sheehan, C. C., Madjic, K., Stefonetti, M. C., Miller, M. C., . . . Fratzola, J. K. (2012). The effects of pointing out failures of inattentional blindness on performance and situation awareness. Proceedings of the Human Factors and Ergonomics Society Annual Meeting (pp. 1094-1098). Los Angeles, CA: Sage.

Durso, F. T., Bleckley, M. K., & Dattel, A. R. (2006). Does situation awareness add to the validity of cognitive tests? Human Factors, 48(4), 721-733.

Durso, F. T., Hackworth, C. A., Truitt, T. R., Crutchfield, J., Nikolic, D., & Manning, C. A. (1998). Situation awareness as a predictor of performance for en route air traffic controllers. Air Traffic Control Quarterly, 6(1), 1-20.

Edwards, T., Homola, J., Mercer, J., & Claudatos, L. . (2016). Multifactor interactions and the air traffic controller: The interaction of situation awareness and workload in association with automation. IFAC-PapersOnLine, 19(597-602).

Endsley, M. R. (1988). Situation Awareness Global Assessment Technique (SAGAT). Proceedings of the National Aerospace and Electronics Conference (NAECON) (pp. 789-795). New York: IEEE.

Endsley, M. R. (1990a). A methodology for the objective measurement of situation awareness Situational Awareness in Aerospace Operations (AGARD-CP-478) (pp. 1/1 - 1/9). Neuilly Sur Seine, France: NATO - AGARD.

Endsley, M. R. (1990b). Predictive utility of an objective measure of situation awareness. Proceedings of the Human Factors Society 34th Annual Meeting (pp. 41-45). Santa Monica, CA: Human Factors Society.

Endsley, M. R. (1995). Measurement of situation awareness in dynamic systems. Human Factors, 37(1), 65-84.

Endsley, M. R. (2000). Direct measurement of situation awareness: Validity and use of SAGAT. In M. R. Endsley & D. J. Garland (Eds.), Situation awareness analysis and measurement (pp. 147-174). Mahwah, NJ: LEA.

Endsley, M. R. (2017). Autonomous driving systems: A preliminary naturalistic study of the Tesla Model S. Journal of Cognitive Engineering and Decision Making, 11(3), 225-238.

Endsley, M. R., & Bolstad, C. A. (1994). Individual differences in pilot situation awareness. International Journal of Aviation Psychology, 4(3), 241-264.

Endsley, M. R., & Kaber, D. B. (1999). Level of automation effects on performance, situation awareness and workload in a dynamic control task. Ergonomics, 42(3), 462-492.

Endsley, M. R., & Kiris, E. O. (1995). The out-of-the-loop performance problem and level of control in automation. Human Factors, 37(2), 381-394.

Endsley, M. R., Mogford, R. H., & Stein, E. S. (1997). Controller situation awareness in free flight. Proceedings of the Human Factors and Ergonomics Society 41st Annual Meeting (pp. 4-8). Santa Monica, CA: Human Factors and Ergonomics Society.

Endsley, M. R., & Rodgers, M. D. (1998). Distribution of attention, situation awareness, and workload in a passive air traffic control task: Implications for operational errors and automation. Air Traffic Control Quarterly, 6(1), 21-44.

Endsley, M. R., & Selcon, S. J. (1997). Designing to aid decisions through situation awareness enhancement. Proceedings of the 2nd Symposium on Situation Awareness in Tactical Aircraft (pp. 107-112). Patuxent River, MD: Naval Air Warfare Center.

Endsley, M. R., Selcon, S. J., Hardiman, T. D., & Croft, D. G. (1998). A comparative evaluation of SAGAT and SART for evaluations of situation awareness. Proceedings of the Human Factors and Ergonomics Society Annual Meeting (pp. 82-86). Santa Monica, CA: Human Factors and Ergonomics Society.

Endsley, M. R., Sollenberger, R., Nakata, A., Hough, D., & Stein, E. (1999). Situation awareness in air traffic control: Enhanced displays for advanced operations Atlantic City, NJ: Federal Aviation Administration William J. Hughes Technical Center.

Endsley, M. R., Sollenberger, R., Nakata, A., & Stein, E. (2000). Situation awareness in air traffic control: Enhanced displays for advanced operations (DOT/FAA/CT-TN00/01). Atlantic City, NJ: Federal Aviation Administration William J. Hughes Technical Center.

Endsley, M. R., Sollenberger, R., & Stein, E. (1999). The use of predictive displays for aiding controller situation awareness. Proceedings of the 43rd Annual Meeting of the Human Factors and Ergonomics Society (pp. 51-55). Santa Monica, CA: Human Factors and Ergonomics Society.

Entin, E. B. (2000). An exploratory investigation of relationships between situation awareness and performance in an attack helicopter domain. Proceedings of the Human Factors and Ergonomics Society Annual Meeting (pp. 113-115). Los Angeles, CA: Sage.

Falkland, E. C., & Wiggins, M. W. (2019). Cross-task cue utilisation and situational awareness in simulated air traffic control. Applied Ergonomics, 74, 24-30.

Franz, B., Haccius, J. P., Stelzig-Krombholz, D., Pfromm, M., Kauer, M., & Abendroth, B. (2015). Evaluation of the SAGAT method for highly automated driving. Proceedings of the 19th Triennial Congress of the IEA (pp. 14).

Gardner, A. K., Kosemund, M., & Martinez, J. (2017). Examining the feasibility and predictive validity of the SAGAT tool to assess situation awareness among medical trainees. Simulation in Healthcare, 12(1), 17-21.

Gartenberg, D., Breslow, L., McCurry, J. M., & Trafton, J. G. (2014). Situation awareness recovery. Human Factors, 56(4), 710-727.

Gatsoulis, Y., Virk, G. S., & Dehghani-Sanij, A. A. (2010). On the measurement of situation awareness for effective human-robot interaction in teleoperated systems. Journal Of Cognitive Engineering And Decision Making, 4(1), 69-98.

Giacobe, N. A. (2013). A picture is worth a thousand alerts. Proceedings of the Human Factors and Ergonomics Society Annual Meeting (pp. 172-176). Los Angeles, CA: Sage.

Golightly, D., Balfe, N., Sharples, S., & Lowe, E. (2009). Measuring situation awareness in rail signalling. Proceedings of the Third International Conference on Rail Human Factors Lille, France

Gombolay, M., Bair, A., Huang, C., & Shah, J. (2017). Computational design of mixed-initiative human–robot teaming that considers human factors: situational awareness, workload, and workflow preferences. The International Journal of Robotics Research, 36(5-7), 597-617.

Gonzalez, C., & Wimisberg, J. (2007). Sitaution awareness in dynamic decision making: Effects of practice and working memory. Journal of Cognitive Engineering and Decision Making, 1(1), 56-74.

González-Giraldo, Y., González-Reyes, R. E., Mueller, S. T., Piper, B. J., Adan, A., & Forero, D. A. (2018). Situation Awareness Performance in Healthy Young Adults Is Associated With a Serotonin Transporter Gene Polymorphism. Psychological Reports, 121(5), 877-891.

Gronlund, S. D., Ohrt, D. D., Dougherty, M. R., Perry, J. L., & Manning, C. A. (1998). Aircraft importance and its relevance to situation awareness: Oklahoma University at Norman Dept Of Psychology.

Guarino, S. L., Harper, K., Roth, E., Liu, D., & Vincenzi, D. (2009). Adaptive boundary aids in complex air combat scenarios. Proceedings of the Human Factors and Ergonomics Society Annual Meeting (pp. 66-70). Los Angeles, CA: Sage.

Gugerty, L. (1998). Evidence from a partial report task for forgetting in dynamic spatial memory. Human Factors, 40(3), 498-508.

Gugerty, L. J. (1997). Situation awareness during driving: Explicit and implicit knowledge in dynamic spatial memory. Journal of Experimental Psychology: Applied, 3, 42-66.

Gutzwiller, R. S., & Clegg, B. A. (2012). The role of working memory in levels of situation awareness. Journal of Cognitive Engineering and Decision Making.

Hallbert, B. P. (1997). Situation awareness and operator performance: results from simulator-based studies. Proceedings of the IEEE Sixth Conference on Human Factors and Power Plants (pp. 18/11-18/16). New York: IEEE.

Hamilton, K., Mancuso, V., Mohammed, S., Tesler, R., & McNeese, M. (2017). Skilled and unaware: The interactive effects of team cognition, team metacognition, and task confidence on team performance. Journal of Cognitive Engineering and Decision Making, 11(4), 382-395.

Hanratty, T., Hammell, R. J., Yen, J., McNeese, M., Oh, S., Kim, H.-W., . . . Colombo, D. (2009). Knowledge visualization to enhance human-agent situation awareness within a computational recognition-primed decision system. Proceedings of the Military Communications Conference (MILCON) (pp. 1-7). New York: IEEE.

Hänsel, M., Winkelmann, A., Hardt, F., Gijselaers, W., Hacker, W., Stiehl, M., . . . Müller, M. (2012). Impact of simulator training and crew resource management training on final-year medical students' performance in sepsis resuscitation: a randomized trial. Minerva Anestesiologica, 78(8), 901.

Hauss, Y., & Eyferth, K. (2003). Securing future ATM-concepts' safety by measuring situation awareness in ATC. Aerospace Science And Technology, 7(6), 417-427.

Heenan, A., Herdman, C. M., Brown, M. S., & Robert, N. (2014). Effects of conversation on situation awareness and working memory in simulated driving. Human Factors, 56(6), 1077-1092.

Hoang, T., Jung, Y. C., Holbrook, J. B., & Malik, W. A. (2011). Tower controllers’ assessment of the spot and runway departure advisor (SARDA) Concept. Proceedings of the Ninth USA/Europe Air Traffic Management Research and Development Seminar (ATM2011) Berlin: Citeseer.

Hogan, M. P., Pace, D. E., Hapgood, J., & Boone, D. C. (2006). Use of human patient simulation and the situation awareness global assessment technique in practical trauma skills assessment. Journal of Trauma and Acute Care Surgery, 61(5), 1047-1052.

Hogg, D. N., Folles⊘, K., Strand-Volden, F., & Torralba, B. (1995). Development of a situation awareness measure to evaluate advanced alarm systems in nuclear power plant control rooms. Ergonomics, 38(11), 2394-2413.

Hogg, D. N., Torralba, B., & Volden, F. S. (1993). A situation awareness methodology for the evaluation of process control systems: Studies of feasibility and the implication of use (1993-03-05). Storefjell, Norway: OECD Halden Reactor Project.

Hong, T. C., Andrew, H. S. Y., & Kenny, C. W. L. (2015). Assessing the Situation Awareness of Operators Using Maritime Augmented Reality System (MARS). Proceedings of the Human Factors and Ergonomics Society Annual Meeting (pp. 1722-1726). Los Angeles, CA: Sage.

Hou, M., Kobierski, R. D., & Brown, M. S. (2007). Intelligent adaptive interfaces for the control of mulitple UAVs. Journal of Cognitive Engineering and Decision Making, 1(3), 327-362.

Hudson, K., Taylor, L. A., Kozachik, S. L., Shaefer, S. J., & Wilson, M. L. (2015). Second Life simulation as a strategy to enhance decision‐making in diabetes care: a case study. Journal of Clinical Nursing, 24(5-6), 797-804.

Ikuma, L. H., Harvey, C., Taylor, C. F., & Handal, C. (2014). A guide for assessing control room operator performance using speed and accuracy, perceived workload, situation awareness, and eye tracking. Journal Of Loss Prevention In The Process Industries, 32, 454-465.

Jackson, L., Chapman, P., & Crundall, D. (2009). What happens next? Predicting other road users' behaviour as a function of driving experience and processing time. Ergonomics, 52(2), 154-164.

Jang, G.-s., Sang-moon Suh, Sa-kil Kim, Yong-suk Suh, and Je-yun Park. (2013). A proactive alarm reduction method and its human factors validation test for a main control room for SMART. Annals of Nuclear Energy, 51, 125-134.

Jannat, M., Hurwitz, D. S., Monsere, C., & Funk II, K. H. . (2018). The role of driver’s situational awareness on right-hook bicycle-motor vehicle crashes. Safety Science, 110, 92-101.

Javed, Y., Norris, T., & Johnston, D. (2012). Evaluating SAVER: measuring shared and team situation awareness of emergency decision makers. Paper presented at the 9th international ISCRAM conference, Vancouver, Canada.

Jeon, M., Walker, G. N., & Gable, T. M. (2014). Anger effects on driver situation awareness and driving performance. Presence, 23(1), 71-89.

Jipp, M., & Ackerman, P. L. (2016). The impact of higher levels of automation on performance and situation awareness: a function of information-processing ability and working-memory capacity. Journal of Cognitive Engineering and Decision Making, 10(2), 138-166.

Johannsdottir, K. R., & Herdman, C. M. (2010). The role of working memory in supporting drivers' situation awareness for surrounding traffic. Human Factors, 52(6), 663-673.

Jones, D. G., & Endsley, M. R. (2000). Can real-time probes provide a valid measure of situation awareness? Proceedings of the Human Performance, Situation Awareness and Automation: User-Centered Design for the New Millennium Conference (pp. 245-250). Savannah, GA: SA Technologies, Inc.

Jones, D. G., & Endsley, M. R. (2002). Measurement of shared SA in teams: In initial investigation (SATech-02-05). Marietta, GA: SA Technologies.

Jones, D. G., & Endsley, M. R. (2004). Using real time probes for measuring situation awareness. International Journal of Aviation Psychology, 14(4), 343-367.

Jones, D. G., Quoetone, E. M., Ferree, J. T., Magsig, M. A., & Bunting, W. F. (2003). An initial investigation into the cognitive processes underlying mental projection. Proceedings of the Human Factors and Ergonomics Society 47th Annual Meeting (pp. 596-600). Santa Monica, CA: Human Factors and Ergonomics Society.

Joshi, K., Hernandez, J., Martinez, J., AbdelFattah, K., & Gardner, A. K. . (2018). Should they stay or should they go now? Exploring the impact of team familiarity on interprofessional team training outcomes. The American Journal of Surgery, 215(2), 243-249.

Kaber, D., Onal, E., & Endsley, M. R. (2000). Design of automation for telerobots and the effect on performance, operator situation awareness, and subjective workload. Human Factors and Ergonomics in Manufacturing, 10, 409-430.

Kaber, D., Riley, J. M., Endsley, M. R., Sheik-Nainar, M. A., Zhang, T., & Lampton, D. R. (2013). Measuring situation awareness in virtual environment based training. Military Psychology, 25(4), 330-344.

Kaber, D., Sangeun, J., Zahabi, M., & Pankok, C. (2016). The effect of driver cognitive abilities and distractions on situation awareness and performance under hazard conditions. Transportation Research Part F: Traffic Psychology and Behaviour, 42(1), 177-194.

Kaber, D., Zhang, Y., Jin, S., Mosaly, P., & Garner, M. (2012). Effects of hazard exposure and roadway complexity on young and older driver situation awareness and performance. Transportation research part F: traffic psychology and behaviour, 15(5), 600-611.

Kaber, D. B., & Endsley, M. R. (2004). The Effects of Level of Automation and Adaptive Automation on Human Performance, Situation Awareness and Workload in a Dynamic Control Task. Theoretical Issues in Ergonomic Science, 5(2), 113-153.

Kaber, D. B., Perry, C. M., Segall, N., McClernon, C. K., & Prinzel III, L. J. (2006). Situation awareness implications of adaptive automation for information processing in an air traffic control-related task. International Journal of Industrial Ergonomics, 36(5), 447-462.

Kaber, D. B., Riley, J. M., Sheik-Nainar, M. A., Hyatt, J. R., & Reynolds, J. P. (2006). Assessing infantry soldier situation awareness in virtual environment-based training of urban terrain operations. Proceedings of the International Ergonomics Association Maastricht, The Netherlands:

Kaber, D. B., Wright, M. C., & Sheik-Nainar, M. A. (2006). Investigation of multi-modal interface features for adaptive automation of a human–robot system. International Journal Of Human-Computer Studies, 64(6), 527-540.

Kass, S. J., Cole, K. S., & Stanny, C. J. (2007). Effects of distraction and experience on situation awareness and simulated driving. Transportation Research Part F: Traffic Psychology and Behaviour, 10, 321-329.

Kass, S. J., VanWormer, L. A., Mikulas, W. L., Legan, S., & Bumgarner, D. (2011). Effects of mindfulness training on simulated driving: Preliminary results. Mindfulness, 2(4), 236-241.

Keeler, J., Battiste, H., Hallett, E. C., Roberts, Z., Winter, A., Sanchez, K., . . . Vu, K.-P. L. (2015). May I interrupt? The effect of SPAM probe questions on air traffic controller performance. Procedia Manufacturing, 3, 2998-3004.

Kim, S.-H., & Kaber, D. B. (2009). Assessing the effects of conformal terrain features in advanced head-up displays on pilot performance. Proceedings of the Human Factors and Ergonomics Society annual meeting (pp. 36-40). Los Angeles, CA: Sage.

Kim, S. H., & Kaber, D. B. (2014). Examining the effects of conformal terrain features in advanced head‐up displays on flight performance and pilot situation awareness. Human Factors and Ergonomics in Manufacturing & Service Industries, 24(4), 386-402.

Koch, S. H., Weir, C., Westenskow, D., Gondan, M., Agutter, J., Haar, M., . . . Staggers, N. (2013). Evaluation of the effect of information integration in displays for ICU nurses on situation awareness and task completion time: a prospective randomized controlled study. International Journal Of Medical Informatics, 82(8), 665-675.

Kraemer, J., & Süß, H. M. . (2015). Real time validation of online situation awareness questionnaires in simulated approach air traffic control. Procedia Manufacturing, 3, 3152-3159.

Lancaster, J. A., & Casali, J. G. (2008). Investigating pilot performance using mixed-modality simulated data link. Human Factors, 50(2), 183-193.

Lau, N., Jamieson, G. A., & Skraaning Jr, G. (2014). Inter-rater reliability of query/probe-based techniques for measuring situation awareness. Ergonomics, 57(7), 959-972.

Lee, J. D., Gore, B. F., & Campbell, J. L. (1999). Display alternatives for in-vehicle warning and sign information: Message style, location, and modality. Transportation Human Factors, 1(4), 347-375.

Leggatt, A. (2004). Objectively measuring the promulgation of commander’s intent in a coalition effects based planning experiment (MNE3). Proceedings of the 9th International Command and Control Research and Technology Symposium (pp. 143-177).

Li, X., Sanderson, P., Memisevic, R., & Wong, W. (2007). Adapting situational awareness measures for hydropower display evaluations. Proceedings of the Human Factors and Ergonomics Society Annual Meeting (pp. 210-214). Los Angeles, CA: Sage.

Liang, G. F., Lin, J. T., Hwang, S. L., Wang, E. M. Y., & Patterson, P. . (2010). Preventing human errors in aviation maintenance using an on-line maintenance assistance platform. International Journal of Industrial Ergonomics, 40(3), 356-367.

Lichacz, F. M., Cain, B., & Patel, S. (2003). Calibration of confidence in situation awareness queries. Proceedings of the Human Factors and Ergonomics Society Annual Meeting (pp. 222-226). Los Angeles, CA: Sage.

Lin, C. J., Lin, P.-H., Chen, H.-J., Hsieh, M.-C., Yu, H.-C., Wang, E. M.-Y., & Ho, H. L. (2012). Effects of controller-pilot communication medium, flight phase and the role in the cockpit on pilots’ workload and situation awareness. Safety Science, 50(9), 1722-1731.

Lin, C. J., Yenn, T. C., & Yang, C. W. . (2010). Automation design in advanced control rooms of the modernized nuclear power plants. Safety Science, 48(1), 63-71.

Lo, J. C., Sehic, E., Brookhuis, K. A., & Meijer, S. A. (2016). Explicit or implicit situation awareness? Measuring the situation awareness of train traffic controllers. Transportation Research Part F: Traffic Psychology And Behaviour, 43, 325-338.

Loft, S., Bowden, V., Braithwaite, J., Morrell, D. B., Huf, S., & Durso, F. T. (2015). Situation awareness measures for simulated submarine track management. Human Factors, 57(2), 298-310.

Loft, S., Jooste, L., Li, Y. R., Ballard, T., Huf, S., Lipp, O. V., & Visser, T. A. (2018). Using Situation Awareness and Workload to Predict Performance in Submarine Track Management: A Multilevel Approach. Human Factors, 60(7), 978-991.

Loft, S., Morrell, D. B., & Huf, S. (2013). Using the situation present assessment method to measure situation awareness in simulated submarine track management. International Journal of Human Factors and Ergonomics, 2(1), 33-48.

Loft, S., Morrell, D. B., Ponton, K., Braithwaite, J., Bowden, V., & Huf, S. (2016). The impact of uncertain contact location on situation awareness and performance in simulated submarine track management. Human factors, 58(7), 1052-1068.

Luz, M., Manzey, D., Mueller, S., Dietz, A., Meixensberger, J., & Strauss, G. (2014). Impact of navigated‐control assistance on performance, workload and situation awareness of experienced surgeons performing a simulated mastoidectomy. The International Journal of Medical Robotics and Computer Assisted Surgery, 10(2), 187-195.

Ma, R., & Kaber, D. (2005). Situation awareness and workload in driving while using adaptive cruise control and a cell phone. International Journal of Industrial Ergonomics, 35(939-953).

Ma, R., & Kaber, D. (2007). Situation awareness and driving performance in a simulated navigation task. Ergonomics, 50(8), 1351-1364.

Manzey, D., Luz, M., Mueller, S., Dietz, A., Meixensberger, J., & Strauss, G. (2011). Automation in surgery: the impact of navigated-control assistance on performance, workload, situation awareness, and acquisition of surgical skills. Human Factors, 53(6), 584-599.

McClernon, C. K., Kaber, D. B., Perry, C. M., & Segall, N. (2006). Towards a sensitive measure of situation aware- ness in adaptively automated systems. Proceedings of the 50th Annual Meeting of the Human Factors and Ergonomics Society (pp. 275-279). Santa Monica, CA: Human Factors and Ergonomics Society.

McDermott, P. L., & Fisher, A. (2013). Methodologies for Assessing Situation Awareness of Unmanned System Operators. Proceedings of the Human Factors and Ergonomics Society Annual Meeting (pp. 167-171). Los Angeles, CA: Sage.

McGeorge, N., Hegde, S., Berg, R. L., Guarrera-Schick, T. K., LaVergne, D. T., Casucci, S. N., . . . Fairbanks, R. J. (2015). Assessment of innovative emergency department information displays in a clinical simulation center. Journal of cognitive engineering and decision making, 9(4), 329-346.

McGowan, A., & Banbury, S. (2004). Interruption and reorientation effects of a situation awareness probe on driving hazard anticipation. Proceedings of the Human Factors and Ergonomics Society Annual Meeting (pp. 290-294). Los Angeles, CA: Sage.

McKenna, L., Missen, K., Cooper, S., Bogossian, F., Bucknall, T., & Cant, R. (2014). Situation awareness in undergraduate nursing students managing simulated patient deterioration. Nurse Education Today, 34(6), e27-e31.

Metzger, U., & Parasuraman, R. (2001). The role of the air traffic controller in future air traffic management: An empirical study of active control vs. passive monitoring. Human Factors, 43(4), 519-528.

Morgan, C. A., Chiappe, D. L., Kraut, J., Strybel, T. Z., & Vu, K. P. L. (2012). An investigation into the potential sources of interference in SA probe techniques. Advances in human aspects of aviation, 623-631.

Morgan, P., Tregunno, D., Brydges, R., Pittini, R., Tarshis, J., Kurrek, M., . . . Ryzynski, A. (2015). Using a situational awareness global assessment technique for interprofessional obstetrical team training with high fidelity simulation. Journal Of Interprofessional Care, 29(1), 13-19.

Motz, F., Dalinger, E., Widdel, H., Höckel, S., MacKinnon, S., Mann, C., & Ley, D. (2009). Comparison of traditional and integrated bridge design with SAGAT. Marine Navigation and Safety of Sea Transportation, 197.

Müller, S., Manzey, D., Schreiter, K., & Luckner, R. (2015). Implementing energy status in head-down cockpit displays: impact of augmented energy information on pilot’s performance. Proceedings of the Human Factors and Ergonomics Society Annual Meeting (pp. 926-930). Los Angeles, CA: Sage.

Naderpour, M., Lu, J., & Zhang, G. (2016). A safety-critical decision support system evaluation using situation awareness and workload measures. Reliability Engineering & System Safety, 150, 147-159.

Noah, B., Li, J., & Rothrock, L. . (2017). An evaluation of touchscreen versus keyboard/mouse interaction for large screen process control displays. Applied ergonomics, 64, 1-13.

Nunes, A. (2003). The impact of automation use on the mental model: findings from the air traffic control domain. Proceedings of the Human factors and ergonomics society annual meeting (pp. 66-70). Los Angeles, CA: Sage.

O'Brien, K. S., & O'Hare, D. (2007). Situational awareness ability and cognitive skills training in a complex real-world task. Ergonomics, 50(7), 1064-1091.

O'Meara, P., Munro, G., Williams, B., Cooper, S., Bogossian, F., Ross, L., . . . McClounan, M. (2015). Developing situation awareness amongst nursing and paramedicine students utilizing eye tracking technology and video debriefing techniques: A proof of concept paper. International Emergency Nursing, 23(2), 94-99.

Oberheid, H., Weber, B., & Rudolph, M. (2009). Visual controller aids to support late merging operations for fuel efficient and noise reduced approach procedures. Proceedings of the Human Factors and Ergonomics Society Annual Meeting (pp. 11-15). Los Angeles, CA: Sage.

Paletta, L., Dini, A., Murko, C., Yahyanejad, S., Schwarz, M., Lodron, G., . . . Velik, R. (2017). Towards real-time probabilistic evaluation of situation awareness from human gaze in human-robot interaction. Proceedings of the Companion of the 2017 ACM/IEEE International Conference on Human-Robot Interaction (pp. 247-248). ACM.

Parush, A., G. Mastoras, A. Bhandari, Kathryn Momtahan, Kathy Day, B. Weitzman, Benjamin Sohmer, A. Cwinn, S. J. Hamstra, and L. Calder. (2017). Can teamwork and situational awareness (SA) in ED resuscitations be improved with a technological cognitive aid? Design and a pilot study of a team situation display. Journal Of Biomedical Informatics, 76, 154-161.

Parush, A., Hazan, M., & Shtekelmacher, D. (2017). Individuals Perform Better in Teams but Are Not More Aware-Performance and Situational Awareness in Teams and Individuals. Proceedings of the Human Factors and Ergonomics Society Annual Meeting (pp. 1173-1177). Los Angeles, CA: Sage.

Parush, A., & Rustanjaja, N. (2013). The impact of sudden events and spatial configuration on the benefits of prior information to situation awareness and performance. Proceedings of the Human Factors and Ergonomics Society Annual Meeting (pp. 1395-1399). Los Angeles, CA: Sage.

Pennathur, P. R., Dapeng Cao, Ann M. Bisantz, Li Lin, Rollin J. Fairbanks, Robert L. Wears, Shawna J. Perry, Theresa K. Guarrera, Jennifer L. Brown, and Zheng Sui. (2011). Emergency department patient-tracking system evaluation. International Journal of Industrial Ergonomics, 41(4), 360-369.

Perry, C. M., Sheik-Nainar, M. A., Segall, N., Ma, R., & Kaber, D. B. (2008). Effects of physical workload on cognitive task performance and situation awareness. Theoretical Issues in Ergonomics Science, 9(2), 95-113.

Pierce, R. S. (2012). The effect of SPAM administration during a dynamic simulation. Human Factors, 54(5), 838-848.

Pierce, R. S., Strybel, T. Z., & Vu, K.-P. L. (2008). Comparing situation awareness measurement techniques in a low fidelity air traffic control simulation. Proceedings of the 26th International Congress of the Aeronautical Sciences (ICAS) (pp. 1-8). Anchorage, AS: ICAS.

Pierce, R. S., Vu, K.-P. L., Nguyen, J., & Strybel, T. Z. (2008). The relationship between SPAM, workload, and task performance on a simulated ATC task. Proceedings of the Human Factors and Ergonomics Society Annual Meeting (pp. 34-38). Los Angeles, CA: Sage.

Price, T., Tenan, M., Head, J., Maslin, W., & LaFiandra, M. (2016). Acute stress causes over confidence in situation awareness. Proceedings of the 2016 IEEE International Multi-Disciplinary Conference on Cognitive Methods in Situation Awareness and Decision Support (CogSIMA) (pp. 1-6). New York: IEEE.

Price, T. F., & LaFiandra, M. (2017). The perception of team engagement reduces stress induced situation awareness overconfidence and risk-taking. Cognitive Systems Research, 46, 52-60.

Prince, C., Ellis, E., Brannick, M. T., & Salas, E. (2007). Measurement of team situation awareness in low experience level aviators. The International Journal of Aviation Psychology, 17(1), 41-57.

Puuska, S., Rummukainen, L., Timonen, J., Lääperi, L., Klemetti, M., Oksama, L., & Vankka, J. (2018). Nationwide critical infrastructure monitoring using a common operating picture framework. International Journal of Critical Infrastructure Protection, 20(28-47).

Radlmayr, J., Brüch, K., Schmidt, K., Solbeck, C., & Wehner, T. (2018). Peripheral Monitoring of Traffic in Conditionally Automated Driving. Proceedings of the Human Factors and Ergonomics Society Annual Meeting (pp. 1828-1832). Los Angeles, CA: Sage.

Randel, J. M., Pugh, H. L., & Reed, S. K. (1996). Differences in expert and novice situation awareness in naturalistic decision making. International Journal of Human-Computer Studies, 45(5), 579-597.

Riley, J. M., & Kaber, D. B. (2001). Utility of situation awareness and attention for describing telepresence experiences in a virtual teloperation task. Proceedings of the International Conference on Computer-Aided Ergonomics and Safety Maui, HI:

Riley, J. M., Kaber, D. B., & Draper, J. V. (2004). Situation awareness and attention allocation measures for quantifying telepresence experiences in teleoperation. Human Factors and Ergonomics in Manufacturing, 14(1), 51-67.

Riley, J. M., Scielzo, S., Hyatt, J. R., Davis, F., & Colombo, D. J. (2009). Situation Awareness and Performance Feedback toward Enhancing Learning with Game Trainers: An Approach and Lessons Learned. Proceedings of the Annual Meeting of the Human Factors and Ergonomics Society (pp. 1994-1998). Santa Monica, CA: Human Factors and Ergonomics Society.

Riley, J. M., & Strater, L. D. (2006). Effects of robot control mode on situation awareness and performance in a navigation task. Proceedings of the Human Factors and Ergonomics Society annual meeting (pp. 540-544). Los Angeles, CA: Sage.

Riley, J. M., Strater, L. D., Sethumadhavan, A., Davis, F., Tharanathan, A., & Kokini, C. (2008). Performance and situation awareness effects in collaborative robot control with automation. Proceedings of the Human Factors and Ergonomics Society 52nd Annual Meeting Santa Monica, CA: Human Factors and Ergonomics Society.

Rose, J., Bearman, C., & Dorrian, J. (2018). The Low-Event Task Subjective Situation Awareness (LETSSA) technique: Development and evaluation of a new subjective measure of situation awareness. Applied Ergonomics, 68, 273-282.

Rosenman, E. D., Dixon, A. J., Webb, J. M., Brolliar, S., Golden, S. J., Jones, K. A., . . . Chao, G. T. (2018). A Simulation‐based Approach to Measuring Team Situational Awareness in Emergency Medicine: A Multicenter, Observational Study. Academic Emergency Medicine, 25(2), 196-204.

Ross, J. M., Barnett, J. S., & Meliza, L. L. (2007). Effect of audio-visual alerts on situation awareness and workload in a net-centric warfare scenario. Proceedings of the Human Factors and Ergonomics Society Annual Meeting (pp. 1205-1209). Los Angeles, CA: Sage.

Sætrevik, B. (2012). A controlled field study of situation awareness measures and heart rate variability in emergency handling teams. Proceedings of the Human Factors and Ergonomics Society Annual Meeting (pp. 2006-2010). Los Angeles, CA: Sage.

Salmon, P. M., Stanton, N. A., Walker, G. H., Jenkins, D., Ladva, D., Rafferty, L., & Young, M. (2009). Measuring Situation Awareness in complex systems: Comparison of measures study. International Journal of Industrial Ergonomics, 39(3), 490-500.

Saner, L. D., Bolstad, C. A., Gonzalez, C., & Cuevas, H. M. (2009). Measuring and predicting shared situation awareness in teams. Journal of Cognitive Engineering and Decision Making, 3(3), 280-308.

Schaffer, J., O’Donovan, J., Marusich, L., Yu, M., Gonzalez, C., & Höllerer, T. (2018). A study of dynamic information display and decision-making in abstract trust games. International Journal of Human-Computer Studies, 113, 1-14.

Schuster, D., Keebler, J. R., Jentsch, F., & Zuniga, J. (2012). Comparison of SA Measurement Techniques in a Human-Robot Team Task. Proceedings of the Proceedings of the Human Factors and Ergonomics Society Annual Meeting (pp. 1713-1717). Los Angeles, CA: Sage.

Seet, A. W., Teh, C. A., Soo, J. K., & Teo, L. (2004). Constructible assessment for situation awareness in a distributed C2 environment Singapore: DSO National Laboratories

Selkowitz, A., Lakhmani, S., Chen, J. Y., & Boyce, M. (2015). The Effects of Agent Transparency on Human Interaction with an Autonomous Robotic Agent. Proceedings of the Proceedings of the and Ergonomics Society Annual Meeting (pp. 806-810). Los Angeles, CA: Sage.

Selkowitz, A. R., Lakhmani, S. G., Larios, C. N., & Chen, J. Y. (2016). Agent transparency and the autonomous squad member. Proceedings of the Human Factors and Ergonomics Society Annual Meeting (pp. 1319-1323). Los Angeles, CA: Sage.

Selkowitz, A. R., Lakhmani, S. G., & Chen, J. Y. (2017). Using agent transparency to support situation awareness of the Autonomous Squad Member. Cognitive Systems Research, 46, 13-25.

Sethumadhavan, A. (2009). Effects of automation types on air traffic controller situation awareness and performance. Proceedings of the Human Factors and Ergonomics Society Annual Meeting (pp. 1-5). Los Angeles, CA: Sage.

Sethumadhavan, A. (2011). Effects of first automation failure on situation awareness and performance in an air traffic control task. Proceedings of the Proceedings of the and Ergonomics Society Annual Meeting (pp. 350-354). Los Angeles, CA: Sage.

Shelton, C. L., Kinston, R., Molyneux, A. J., & Ambrose, L. J. (2013). Real-time situation awareness assessment in critical illness management: adapting the situation present assessment method to clinical simulation. BMJ Qual Saf, 22(2), 163-167.

Silva, H. I., Grigoleit, T., Ann Burress, M., & Fitzpatrick, D. (2017). Measuring the Impact of Console Operator Experience in a Simulated Petrochemical Refining Emergency Event. Proceedings of the Human Factors and Ergonomics Society Annual Meeting (pp. 527-531). Los Angeles, CA: Sage.

Silva, H. I., Ziccardi, J., Grigoleit, T., Battiste, V., Strybel, T. Z., & Vu, K.-P. L. (2013). Are the intrusive effects of spam probes present when operators differ by skill level and training? Proceedings of the International Conference on Human Interface and the Management of Information (pp. 269-275). Springer.

Smets, N., te Brake, G. M., Lindenberg, J., & Neerincx, M. A. (2007). Influence of mobile map size and user capacities on situation awareness tested in a virtual environment. Proceedings of the 4th International ISCRAM Conference Delft, the Netherlands: ISCRAM.

Snow, M. P., & French, G. A. (2002). Effects of primary flight symbology on workload and situation awareness in a head-up synthetic vision display Wright-Patterson AFB, OH: Air Force Research Lab Crew System Interface Division.

Snow, M. P., & Reising, J. M. (1999). Effect of pathway-in-the-sky and synthetic terrain imagery on situation awareness in a simulated low-level ingress scenario Wright-Patterson AFB, OH: Air Force Research Lab Crew System Interface Division.

Soliman, A. M. (2010). Exploring the central executive in situation awareness. Psychological Reports, 106(1), 105-118.

Soliman, A. M., & Mathna, E. K. (2009). Metacognitive strategy training improves driving situation awareness. Social Behavior and Personality: an international journal, 37(9), 1161-1170.

Sorensen, L. J., Stanton, N., & Banks, A. P. (2010). Back to SA school: Contrasting three approaches to situation awareness in the cockpit. Theoretical Issues in Ergonomics Science, 12(6), 451-471.

Stanners, M., & French, H. T. (2005). An empirical study of the relationship between situation awareness and decision making (DSTO-TR-1687). Australia: Defence Science And Technology Organization Edinburgh (Australia) Land Operations Div.

Strater, L. D., Cuevas, H. M., Connors, E. S., Gonzalez, C., Ungvarsky, D. M., & Endsley, M. R. (2010). An investigation of technology-mediated ad hoc team operations: Consideration of components of team situation awareness. In K. Mosier & U. Fischer (Eds.), Informed by knowledge: Expert performance in complex situations (pp. 153-168). Boca Raton, FL: Taylor and Francis.

Strater, L. D., Endsley, M. R., Pleban, R. J., & Matthews, M. D. (2001). Measures of platoon leader situation awareness in virtual decision making exercises (Research Report 1770). Alexandria, VA: Army Research Institute.

Strater, L. D., Faulkner, L. A., Hyatt, J. R., & Endsley, M. R. (2006). Effect of display icon modality on situation awareness. Paper presented at the Human Factors and Ergonomics Society 50th Annual Meeting, Santa Monica, CA.

Strater, L. D., Reynolds, J. P., Faulkner, L. A., Birch, K., Hyatt, J., Swetnam, S., & Endsley, M. R. (2004). PC-based tools to improve infantry situation awareness. Proceedings of the Human Factors and Ergonomics Society Annual Meeting (pp. 668-672). Santa Monica, CA: Human Factors and Ergonomics Society.

Stratton, A., Furey, A., & Hogan, M. (2014). The effect of sleep deprivation on a resident's situational awareness in a trauma scenario. Journal Of Orthopaedic Trauma, 28(7), e160-e163.

Strybel, T. Z., Chiappe, D., Vu, K.-P. L., Miramontes, A., Battiste, H., & Battiste, V. (2016). A Comparison of Methods for Assessing Situation Awareness in Current Day and Future Air Traffic Management Operations: Graphics-Based vs Text-Based Online Probe Systems. IFAC-PapersOnLine, 49(19), 31-35.

Strybel, T. Z., Minakata, K., Nguyen, J., Pierce, R., & Vu, K.-P. L. (2009). Optimizing online situation awareness probes in air traffic management tasks. Proceedings of the Symposium on Human Interface (pp. 845-854). Springer.

Strybel, T. Z., Vu, K.-P. L., Bacon, L. P., Kraut, J., Battiste, V., & Johnson, W. (2010). Diagnosticity of an online query technique for measuring pilot situation awareness in NextGen. Proceedings of the Digital Avionics Systems Conference (DASC), 2010 IEEE/AIAA 29th (pp. 4. B. 1-1-4. B. 1-12). IEEE.

Strybel, T. Z., Vu, K.-P. L., Battiste, V., & Johnson, W. (2013). Measuring the impact of NextGen operating concepts for separation assurance on pilot situation awareness and workload. The International Journal of Aviation Psychology, 23(1), 1-26.

Strybel, T. Z., Vu, K.-P. L., Kraft, J., & Minakata, K. (2008). Assessing the situation awareness of pilots engaged in self spacing. Proceedings of the Human Factors and Ergonomics Society Annual Meeting (pp. 11-15). Los Angeles, CA: Sage.

Sulistayawati, K., Wickens, C. D., & Chui, Y. P. (2011). Prediction in situation awareness: Confidence bias and underlying cognitive abilities. International Journal of Aviation Psychology, 21(2), 153-174.

Sulistyawati, K., Chui, Y. P., & Wickens, C. D. (2008). Multi-method approach to team situation awareness. Proceedings of the Human Factors and Ergonomics Society Annual Meeting (pp. 463-467). Los Angeles, CA: Sage.

Sulistyawati, K., Wickens, C. D., & Chui, Y. P. (2009). Exploring the concept of team situation awareness in a simulated air combat environment. Journal of Cognitive Engineering and Decision Making, 3(4), 309-330.

Taber, M. J., McCabe, J., Klein, R. M., & Pelot, R. P. (2013). Development and evaluation of an offshore oil and gas Emergency Response Focus Board. International Journal of Industrial Ergonomics, 43(1), 40-51.

Taylor, B., Chekaluk, E., & Irwin, J. (2016). Reading the situation: The relationship between dyslexia and situational awareness for road sign information. Transportation Research Part F: Traffic Psychology And Behaviour, 36(6-13).

Tharanathan, A., Bullemer, P., Laberge, J., Reising, D. V., & Mclain, R. (2012). Impact of functional and schematic overview displays on console operators’ situation awareness. Journal of Cognitive Engineering and Decision Making, 6(2), 141-164.

Tharanathan, A., Laberge, J., Bullemer, P., Reising, D. V., & McLain, R. (2010). Functional versus schematic overview displays: Impact on operator situation awareness in process monitoring. Proceedings of the Proceedings of the and Ergonomics Society Annual Meeting (pp. 319-323). Los Angeles, CA: Sage.

Trapsilawati, F., Wickens, C. D., Qu, X., & Chen, C.-H. (2016). Benefits of imperfect conflict resolution advisory aids for future air traffic control. Human Factors, 58(7), 1007-1019.

Tremblay, S., Vachon, F., Rousseau, R., & Breton, R. (2012). Promoting temporal awareness for dynamic decision making in command and control. Advances in cognitive engineering and neuroergonomics, 16, 189-198.

Trujillo, A. C. (2004). A Centralized Display for Mission Monitoring. Proceedings of the Human Factors and Ergonomics Society Annual Meeting (pp. 325-329). Los Angeles, CA: Sage.

Tumkaya, S., Karadag, F., Mueller, S. T., Ugurlu, T. T., Oguzhanoglu, N. K., Ozdel, O., . . . Bayraktutan, M. (2013). Situation awareness in obsessive-compulsive disorder. Psychiatry Research, 209(3), 579-588.

Vachon, F., Lafond, D., Vallieres, B. R., Rousseau, R., & Tremblay, S. (2011). Supporting situation awareness: A tradeoff between benefits and overhead. Proceedings of the Cognitive Methods in Situation Awareness and Decision Support (CogSIMA), 2011 IEEE First International Multi-Disciplinary Conference on (pp. 284-291). New York: IEEE.

Van den Beukel, A. P., & van der Voort, M. C. (2017). How to assess driver's interaction with partially automated driving systems–A framework for early concept assessment. Applied Ergonomics, 59, 302-312.

Van den Beukel, A. P., van der Voort, M. C., & Eger, A. O. . (2016). Supporting the changing driver’s task: Exploration of interface designs for supervision and intervention in automated driving. Transportation Research Part F: Traffic Psychology And Behaviour, 43, 279-301.

Ventsislavova, P., David Crundall, Thom Baguley, Candida Castro, Andrés Gugliotta, Pedro Garcia-Fernandez, Wei Zhang, Yutao Ba, and Qiucheng Li. (2019). A comparison of hazard perception and hazard prediction tests across China, Spain and the UK. Accident Analysis & Prevention 122(268-286).

Ventsislavova, P., Gugliotta, A., Peña-Suarez, E., Garcia-Fernandez, P., Eisman, E., Crundall, D., & Castro, C. (2016). What happens when drivers face hazards on the road? Accident Analysis & Prevention, 91, 43-54.

Walker, G. H., Stanton, N. A., & Young, M. S. (2006). The ironies of vehicle feedback in car design. Ergonomics, 49(2), 161-179.

Walker, G. H., Stanton, N. A., & Young, M. S. (2008). Feedback and driver situation awareness (SA): A comparison of SA measures and contexts. Transportation Research Part F: Traffic Psychology and Behaviour, 11(4), 282-299.

Weber, B., Oberheid, H., & Papenfuss, A. (2013). Visual Aids for Merging Mixed Arrival Traffic: Effects on Controllers’ Performance, Situation Awareness, and Mental Workload. Proceedings of the Human Factors and Ergonomics Society Annual Meeting (pp. 630-634). Los Angeles, CA: Sage.

Wei, H., Zhuang, D., Wanyan, X., & Wang, Q. (2013). An experimental analysis of situation awareness for cockpit display interface evaluation based on flight simulation. Chinese Journal of Aeronautics, 26(4), 884-889.

Weiler, D. T., Gibson, A. L., & Saleem, J. J. (2018). he effect of role assignment in high fidelity patient simulation on nursing students: An experimental research study. Nurse Education Today, 63, 29-34.

Willems, B. F., & Heiney, M. (2001). Real-time assessment of situation awareness of air traffic control specialists on operational host computer system and display system replacement hardware. Proceedings of the USA/Europe Air Traffic Management R&D Seminar (pp. 1-11). Santa Fe, NM:

Wolf, F., & Kuber, R. (2018). Developing a head-mounted tactile prototype to support situational awareness. International Journal of Human-Computer Studies, 109, 54-67.

Wright, M. C., Kaber, D. B., & Endsley, M. R. (2003). Performance and situation awareness effects of levels of automation in an advanced commercial aircraft flight simulation. Proceedings of the 2th International Symposium on Aviation Psychology (pp. 1277-1282). Dayton, OH: Wright State University.

Wright, S., & O'Hare, D. (2015). Can a glass cockpit display help (or hinder) performance of novices in simulated flight training? Applied Ergonomics 47, 292-299.

Wu, X., Li, Z., Song, F., & Sang, W. (2016). An integrated alarm display design in digital nuclear power plants. Nuclear Engineering and Design, 305, 503-513.

Wulf, F., Zeeb, K., Rimini-Doring, M., Arnon, M., & Gauterin, F. (2013). Effects of human-machine interaction mechanisms on situation awareness in partly automated driving. Proceedings of the 6th International IEEE Conference onIntelligent Transportation Systems-(ITSC) (pp. 2012-2019). New York: IEEE.

Yuan, X., She, M., Li, Z., Zhang, Y., & Wu, X. . (2016). Mutual awareness: Enhanced by interface design and improving team performance in incident diagnosis under computerized working environment. International Journal of Industrial Ergonomics, 54, 65-72.

Zhang, T., Kaber, D., & Hsiang, S. (2010). Characterization of mental models in a virtual reality-based multitasking scenario using measures of situation awareness. Theoretical Issues in Ergonomics Science, 11(1-2), 99-118.

Zhang, Y., Drews, F., Westenskow, D. R., Foresti, S., Agutter, J., Bermudez, J. C., . . . Loeb, R. (2002). Effects of integrated graphical displays on situation awareness in anaesthesiology. Cognition, Technology & Work, 4(2), 82-90.
